# Supplementary material for: Rapid screening of unprecedented sesquiterpenes with distinctive ring skeletons from Daphne aurantiaca employing an integrated strategy
Source: Royal Society of Chemistry journal article supplement (doi:10.1039/d3qo00902e), 2023-01-01
Supplement: d3qo00902e1.pdf [file d3qo00902e1.pdf]

## Supporting information

Rapid screening of unprecedented sesquiterpenes with distinctive ring skeletons from *Daphne aurantiaca* employing an integrated strategy

Shu-Hui Dong<sup>a</sup>, Jin-Ling Han<sup>a</sup>, Xin-Yu Chang<sup>b</sup>, Mei-Ya Lian<sup>a</sup>, Xin Zhang<sup>a</sup>, Xiao-Ling Liu<sup>b</sup>, Ming Bai<sup>a</sup>, Xiao-Xiao Huang<sup>a, \*</sup>, Shao-Jiang Song<sup>a, \*</sup>

*a* Engineering Research Center of Natural Medicine Active Molecule Research & Development, Liaoning Province; Key Laboratory of Computational Chemistry-Based Natural Antitumor Drug Research & Development, Liaoning Province; Key Laboratory of Natural Bioactive Compounds Discovery & Modification, Shenyang; School of Traditional Chinese Materia Medica, Shenyang Pharmaceutical University, Shenyang, Liaoning 110016, China

*b* Shenyang Pharmaceutical University Wuya College of Innovation, Shenyang, Liaoning 110016, China

\*Corresponding author.

E-mail addresses: songsj99@163.com (Shao-Jiang Song).

xiaoxiao270@163.com (Xiao-Xiao Huang).

## List of Supporting Information

|                                                                                                                                                          |     |
|----------------------------------------------------------------------------------------------------------------------------------------------------------|-----|
| Experimental Section.....                                                                                                                                | S1  |
| <b>General Experimental Procedures</b> .....                                                                                                             | S1  |
| <b>Extraction and Isolation</b> .....                                                                                                                    | S1  |
| <b>CASE Analysis</b> .....                                                                                                                               | S1  |
| Table 1. <sup>1</sup> H NMR (600 MHz) and <sup>13</sup> C NMR (150 MHz) data for <b>1–3</b> (Recorded in DMSO- <i>d</i> <sub>6</sub> )...S3              |     |
| Table 2. <sup>1</sup> H NMR (600 MHz) and <sup>13</sup> C NMR (150 MHz) data for <b>4–6</b> (Recorded in DMSO- <i>d</i> <sub>6</sub> )...S4              |     |
| Table 3. Calculated <sup>4</sup> J <sub>C-H</sub> .....                                                                                                  | S5  |
| Fig. S4. Key <sup>1</sup> H- <sup>1</sup> H COSY (blue line) and HMBC (red arrow) correlations for compounds <b>1–6</b> ..S5                             |     |
| Fig. S5. Key NOE correlations for compounds <b>1–6</b> .....                                                                                             | S5  |
| Fig. S6. The HR-ESIMS spectrum of the new compound <b>1</b> .....                                                                                        | S6  |
| Fig. S7. The UV spectrum of the new compound <b>1</b> .....                                                                                              | S6  |
| Fig. S8. <sup>1</sup> H NMR (600 MHz, DMSO- <i>d</i> <sub>6</sub> ) spectrum of the new compound <b>1</b> .....                                          | S7  |
| Fig. S9. <sup>13</sup> C NMR (150 MHz, DMSO- <i>d</i> <sub>6</sub> ) spectrum of the new compound <b>1</b> .....                                         | S7  |
| Fig. S10. HSQC (600 MHz, DMSO- <i>d</i> <sub>6</sub> ) spectrum of the new compound <b>1</b> .....                                                       | S8  |
| Fig. S11. HMBC (600 MHz, DMSO- <i>d</i> <sub>6</sub> ) spectrum of the new compound <b>1</b> .....                                                       | S8  |
| Fig. S12. <sup>1</sup> H- <sup>1</sup> H COSY (600 MHz, DMSO- <i>d</i> <sub>6</sub> ) spectrum of the new compound <b>1</b> .....                        | S9  |
| Fig. S13. NOESY (600 MHz, DMSO- <i>d</i> <sub>6</sub> ) spectrum of the new compound <b>1</b> .....                                                      | S9  |
| Fig. S14. DEPT (600 MHz, DMSO- <i>d</i> <sub>6</sub> ) spectrum of the new compound <b>1</b> .....                                                       | S10 |
| Fig. S15. Most stable conformers of the new compound <b>1</b> in solvated model calculations at the B3LYP/6-311++G (2d, p) level in ECD calculation..... | S10 |
| Fig. S16. The HR-ESIMS spectrum of the new compound <b>2</b> .....                                                                                       | S11 |
| Fig. S17. The UV spectrum of the new compound <b>2</b> .....                                                                                             | S11 |
| Fig. S18. <sup>1</sup> H NMR (600 MHz, DMSO- <i>d</i> <sub>6</sub> ) spectrum of the new compound <b>2</b> .....                                         | S12 |
| Fig. S19. <sup>13</sup> C NMR (150 MHz, DMSO- <i>d</i> <sub>6</sub> ) spectrum of the new compound <b>2</b> .....                                        | S12 |
| Fig. S20. HSQC (600 MHz, DMSO- <i>d</i> <sub>6</sub> ) spectrum of the new compound <b>2</b> .....                                                       | S13 |
| Fig. S21. HMBC (600 MHz, DMSO- <i>d</i> <sub>6</sub> ) spectrum of the new compound <b>2</b> .....                                                       | S13 |
| Fig. S22. <sup>1</sup> H- <sup>1</sup> H COSY (600 MHz, DMSO- <i>d</i> <sub>6</sub> ) spectrum of the new compound <b>2</b> .....                        | S14 |
| Fig. S23. NOESY (600 MHz, DMSO- <i>d</i> <sub>6</sub> ) spectrum of the new compound <b>2</b> .....                                                      | S14 |
| Fig. S24. DEPT (600 MHz, DMSO- <i>d</i> <sub>6</sub> ) spectrum of the new compound <b>2</b> .....                                                       | S15 |
| Fig. S25. Linear correlation between the experimental and calculated <sup>13</sup> C NMR chemical shifts of <b>2a</b> and <b>2b</b> .....                | S15 |
| Fig. S26. Results of custom DP4+ analysis of <b>2a</b> and <b>2b</b> .....                                                                               | S16 |
| Fig. S27. Most stable conformers of the new compound <b>2</b> in solvated model calculations at the B3LYP/6-311++G (2d, p) level in ECD calculation..... | S16 |
| Fig. S28. The HR-ESIMS spectrum of the new compound <b>3</b> .....                                                                                       | S17 |
| Fig. S29. The UV spectrum of the new compound <b>3</b> .....                                                                                             | S17 |
| Fig. S30. <sup>1</sup> H NMR (600 MHz, DMSO- <i>d</i> <sub>6</sub> ) spectrum of the new compound <b>3</b> .....                                         | S18 |
| Fig. S31. <sup>13</sup> C NMR (150 MHz, DMSO- <i>d</i> <sub>6</sub> ) spectrum of the new compound <b>3</b> .....                                        | S18 |
| Fig. S32. HSQC (600 MHz, DMSO- <i>d</i> <sub>6</sub> ) spectrum of the new compound <b>3</b> .....                                                       | S19 |
| Fig. S33. HMBC (600 MHz, DMSO- <i>d</i> <sub>6</sub> ) spectrum of the new compound <b>3</b> .....                                                       | S19 |
| Fig. S34. <sup>1</sup> H- <sup>1</sup> H COSY (600 MHz, DMSO- <i>d</i> <sub>6</sub> ) spectrum of the new compound <b>3</b> .....                        | S20 |
| Fig. S35. NOESY (600 MHz, DMSO- <i>d</i> <sub>6</sub> ) spectrum of the new compound <b>3</b> .....                                                      | S20 |
| Fig. S36. DEPT (600 MHz, DMSO- <i>d</i> <sub>6</sub> ) spectrum of the new compound <b>3</b> .....                                                       | S21 |

|                                                                                                                                                                 |     |
|-----------------------------------------------------------------------------------------------------------------------------------------------------------------|-----|
| <b>Fig. S37.</b> Linear correlation between the experimental and calculated $^{13}\text{C}$ NMR chemical shifts of <b>3a–3d</b> .....                           | S21 |
| <b>Fig. S38.</b> Results of custom DP4+ analysis of <b>3a–3d</b> .....                                                                                          | S22 |
| <b>Fig. S39.</b> Most stable conformers of the new compound <b>3</b> in solvated model calculations at the B3LYP/6-311++G (2d, p) level in ECD calculation..... | S22 |
| <b>Fig. S40.</b> The HR-ESIMS spectrum of the new compound <b>4</b> .....                                                                                       | S23 |
| <b>Fig. S41.</b> The UV spectrum of the new compound <b>4</b> .....                                                                                             | S23 |
| <b>Fig. S42.</b> $^1\text{H}$ NMR (600 MHz, $\text{DMSO-}d_6$ ) spectrum of the new compound <b>4</b> .....                                                     | S24 |
| <b>Fig. S43.</b> $^{13}\text{C}$ NMR (150 MHz, $\text{DMSO-}d_6$ ) spectrum of the new compound <b>4</b> .....                                                  | S24 |
| <b>Fig. S44.</b> HSQC (600 MHz, $\text{DMSO-}d_6$ ) spectrum of the new compound <b>4</b> .....                                                                 | S25 |
| <b>Fig. S45.</b> HMBC (600 MHz, $\text{DMSO-}d_6$ ) spectrum of the new compound <b>4</b> .....                                                                 | S25 |
| <b>Fig. S46.</b> $^1\text{H-}^1\text{H}$ COSY (600 MHz, $\text{DMSO-}d_6$ ) spectrum of the new compound <b>4</b> .....                                         | S26 |
| <b>Fig. S47.</b> NOESY (600 MHz, $\text{DMSO-}d_6$ ) spectrum of the new compound <b>4</b> .....                                                                | S26 |
| <b>Fig. S48.</b> DEPT (600 MHz, $\text{DMSO-}d_6$ ) spectrum of the new compound <b>4</b> .....                                                                 | S27 |
| <b>Fig. S49.</b> Linear correlation between the experimental and calculated $^{13}\text{C}$ NMR chemical shifts of <b>4a–4d</b> .....                           | S27 |
| <b>Fig. S50.</b> Results of custom DP4+ analysis of <b>4a–4d</b> .....                                                                                          | S28 |
| <b>Fig. S51.</b> Most stable conformers of the new compound <b>4</b> in solvated model calculations at the B3LYP/6-311++G (2d, p) level in ECD calculation..... | S28 |
| <b>Fig. S52.</b> The HR-ESIMS spectrum of the new compound <b>5</b> .....                                                                                       | S29 |
| <b>Fig. S53.</b> The UV spectrum of the new compound <b>5</b> .....                                                                                             | S29 |
| <b>Fig. S54.</b> $^1\text{H}$ NMR (600 MHz, $\text{DMSO-}d_6$ ) spectrum of the new compound <b>5</b> .....                                                     | S30 |
| <b>Fig. S55.</b> $^{13}\text{C}$ NMR (150 MHz, $\text{DMSO-}d_6$ ) spectrum of the new compound <b>5</b> .....                                                  | S30 |
| <b>Fig. S56.</b> HSQC (600 MHz, $\text{DMSO-}d_6$ ) spectrum of the new compound <b>5</b> .....                                                                 | S31 |
| <b>Fig. S57.</b> HMBC (600 MHz, $\text{DMSO-}d_6$ ) spectrum of the new compound <b>5</b> .....                                                                 | S31 |
| <b>Fig. S58.</b> $^1\text{H-}^1\text{H}$ COSY (600 MHz, $\text{DMSO-}d_6$ ) spectrum of the new compound <b>5</b> .....                                         | S32 |
| <b>Fig. S59.</b> NOESY (600 MHz, $\text{DMSO-}d_6$ ) spectrum of the new compound <b>5</b> .....                                                                | S32 |
| <b>Fig. S60.</b> DEPT (600 MHz, $\text{DMSO-}d_6$ ) spectrum of the new compound <b>5</b> .....                                                                 | S33 |
| <b>Fig. S61.</b> Linear correlation between the experimental and calculated $^{13}\text{C}$ NMR chemical shifts of <b>5a–5d</b> .....                           | S33 |
| <b>Fig. S62.</b> Results of custom DP4+ analysis of <b>5a–5d</b> .....                                                                                          | S34 |
| <b>Fig. S63.</b> Most stable conformers of the new compound <b>5</b> in solvated model calculations at the B3LYP/6-311++G (2d, p) level in ECD calculation..... | S34 |
| <b>Fig. S64.</b> The HR-ESIMS spectrum of the new compound <b>6</b> .....                                                                                       | S35 |
| <b>Fig. S65.</b> The UV spectrum of the new compound <b>6</b> .....                                                                                             | S35 |
| <b>Fig. S66.</b> $^1\text{H}$ NMR (600 MHz, $\text{DMSO-}d_6$ ) spectrum of the new compound <b>6</b> .....                                                     | S36 |
| <b>Fig. S67.</b> $^{13}\text{C}$ NMR (150 MHz, $\text{DMSO-}d_6$ ) spectrum of the new compound <b>6</b> .....                                                  | S36 |
| <b>Fig. S68.</b> HSQC (600 MHz, $\text{DMSO-}d_6$ ) spectrum of the new compound <b>6</b> .....                                                                 | S37 |
| <b>Fig. S69.</b> HMBC (600 MHz, $\text{DMSO-}d_6$ ) spectrum of the new compound <b>6</b> .....                                                                 | S37 |
| <b>Fig. S70.</b> $^1\text{H-}^1\text{H}$ COSY (600 MHz, $\text{DMSO-}d_6$ ) spectrum of the new compound <b>6</b> .....                                         | S38 |
| <b>Fig. S71.</b> NOESY (600 MHz, $\text{DMSO-}d_6$ ) spectrum of the new compound <b>6</b> .....                                                                | S38 |
| <b>Fig. S72.</b> DEPT (600 MHz, $\text{DMSO-}d_6$ ) spectrum of the new compound <b>6</b> .....                                                                 | S39 |
| <b>Fig. S73.</b> Most stable conformers of the new compound <b>6</b> in solvated model calculations at the B3LYP/6-311++G (2d, p) level in ECD calculation..... | S39 |

**Fig. S74.** The BOILED-Egg plot and the Bioavailability Radar plot of **2 (a)** and **3 (b)**.....S40

## Experimental Section

### General Experimental Procedures

Optical rotations were tested by an Anton Paar MCP 200 digital polarimeter (Anton Paar GmbH, Graz, Austria). The UV spectra were recorded on a Shimadzu UV-2600i spectrophotometer (Shimadzu, Kyoto, Japan). NMR spectra were performed on Bruker AVANCE III HD 600 MHz spectrometer using tetramethylchlorosilane (TMS) as the internal standard. HRESIMS experiments of **1**, **4** and **5** were performed using the Thermo Q EXACTIVE mass spectrometer. HRESIMS data of **2** and **6** were carried out by a Bruker COMPACT spectrometer. HRESIMS data of **3** was taken with a Waters G2-S Qtof spectrometer. ECD spectra were measured on a Bio-Logic Science MOS-450 spectrometer (Bio-Logic Science Instruments, Seyssinet-Pariset, France). Column chromatography (CC) was carried out on silica gel (100-200 and 200-300 mesh, Qingdao, China), dianion HP-20 macroporous resin (Mitsubishi Chemical Corporation, Tokyo, Japan), and ODS gel (60–80  $\mu\text{m}$ , Merck, Germany).

### Extraction and Isolation

The whole plants of *D. aurantiaca* (40.0kg) were extracted with 80% aqueous ethanol (3 $\times$ 60L) and the residual alcohol extract was suspended in water and partitioned with petroleum ether (PE), ethyl acetate (EtOAc), and 1-butanol (*n*-BuOH), successively. The EtOAc extract (1800g) was chromatographed on silica gel with  $\text{CH}_2\text{Cl}_2$ -MeOH (1:0 to 0:1) to acquire ten fractions (Fr. A~ Fr. J). Fr. C (130 g) was separated by HP-20 and ODS column with MeOH/ $\text{H}_2\text{O}$  (20:80 to 100:0, *v/v*) to afford twelve fractions (Fr. C1~Fr. C12). Fr.C5 (11.7 g) was separated on a silica gel column eluted with PE-EA and a semi-preparative HPLC to get compounds **1** (1.1 mg), **2** (1.4 mg), **4** (1.5 mg), **5** (1.5 mg), **6** (1.2 mg). Fr.C6 (6.4 g) was purified by a silica gel column and RP-HPLC to obtain compounds **3** (0.5 mg).

### CASE Analysis

The commercially available ACD/Labs 2020 1.1(File Version S15S41, Build 117163, 16 Jul 2020) was used for the CASE analysis. All calculations were performed on a standard 2.90 GHz PC with 16 GB of RAM.

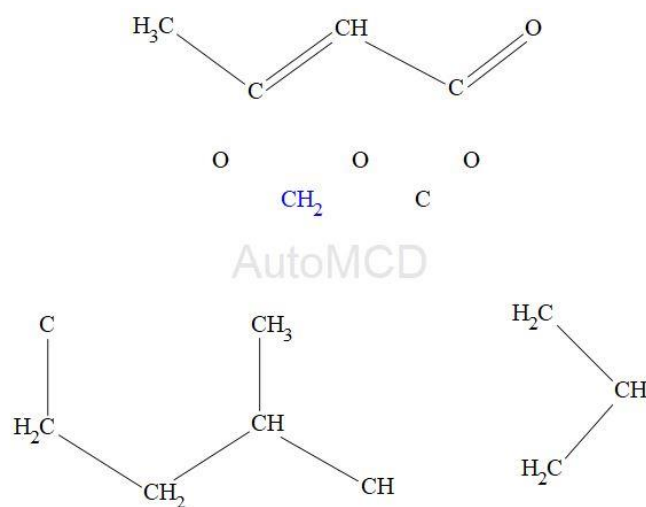

Fig. S1. The molecular connectivity diagram (MCD) for **5**

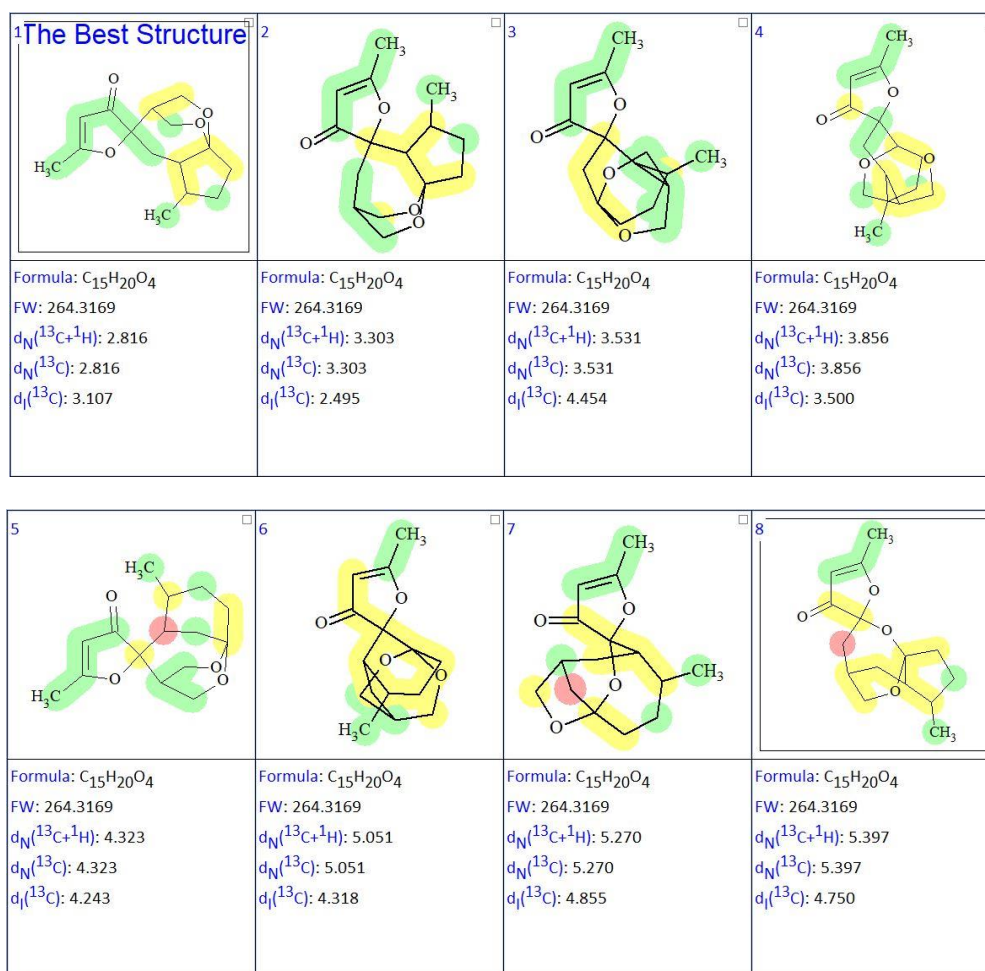

**Fig. S2.** Possible structures were generated by CASE (computer-assisted structure elucidation) expert systems for **5**

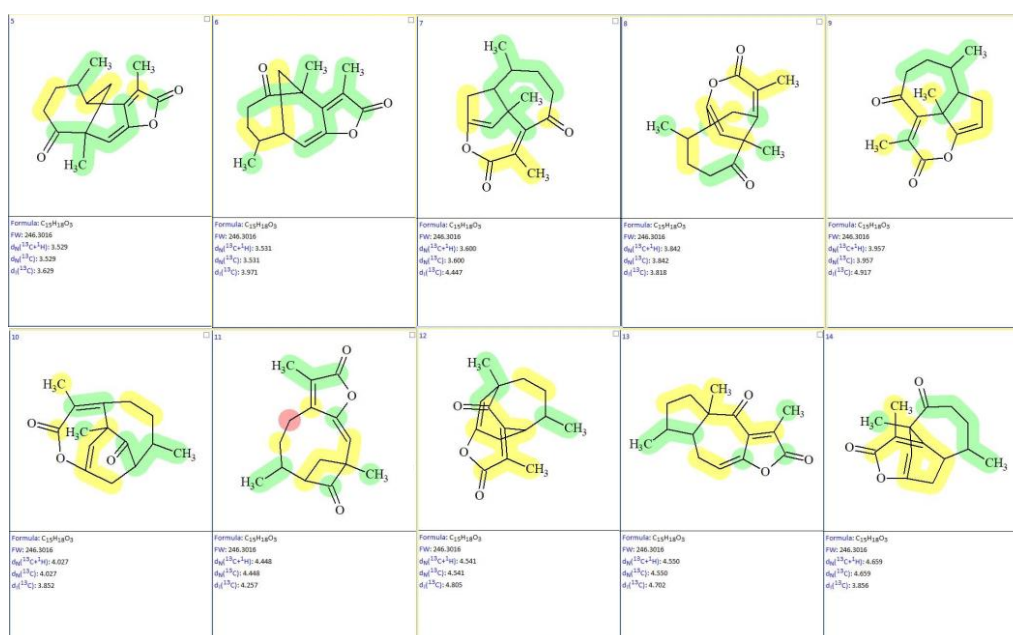

**Fig. S3.** Fifth to fourteenth possible structures were generated by CASE (computer-assisted structure elucidation) expert systems for **1**

**Table 1.** <sup>1</sup>H NMR (600 MHz) and <sup>13</sup>C NMR (150 MHz) data for **1–3** (Recorded in DMSO-*d*<sub>6</sub>)

| No.  | <b>1</b>                                     |                     | <b>2</b>                                     |                     | <b>3</b>                                     |                     |
|------|----------------------------------------------|---------------------|----------------------------------------------|---------------------|----------------------------------------------|---------------------|
|      | $\delta_{\text{H}}$ , mult ( <i>J</i> in Hz) | $\delta_{\text{C}}$ | $\delta_{\text{H}}$ , mult ( <i>J</i> in Hz) | $\delta_{\text{C}}$ | $\delta_{\text{H}}$ , mult ( <i>J</i> in Hz) | $\delta_{\text{C}}$ |
| 1    |                                              | 210.8               | 3.54, m                                      | 76.1                |                                              | 84.5                |
| 2    | $\alpha$ 1.79, m                             | 38.4                | 1.41, m                                      | 38.0                | 1.84, m                                      | 36.7                |
|      | $\beta$ 1.74, m                              |                     |                                              |                     | 1.79, overlap                                |                     |
| 3    | 1.44, m                                      | 26.4                | 1.21, m                                      | 26.5                | 1.79, overlap                                | 29.1                |
|      | 1.20, m                                      |                     | 0.82, m                                      |                     | 1.14, m                                      |                     |
| 4    | 2.07, m                                      | 34.9                | 1.71, m                                      | 33.8                | 2.61, m                                      | 35.1                |
| 5    | 2.81, m                                      | 51.4                | 2.11, m                                      | 41.8                | 1.79, overlap                                | 54.4                |
| 6    | 3.06, dd (18.5, 3.3)                         | 23.2                | 2.76, m                                      | 20.4                | 1.61, m                                      | 17.9                |
|      | 2.42, m                                      |                     | 2.65, dd (18.5, 2.9)                         |                     | 1.30, m                                      |                     |
| 7    |                                              | 148.2               |                                              | 152.4               | 2.50, overlap                                | 42.5                |
|      |                                              |                     |                                              |                     | 2.37, m                                      |                     |
| 8    |                                              | 149.1               |                                              | 148.8               |                                              | 202.5               |
| 9    | 5.62, s                                      | 115.3               | 5.31, s                                      | 118.8               | 5.61, s                                      | 124.9               |
| 10   |                                              | 48.4                |                                              | 40.3                |                                              | 156.9               |
| 11   |                                              | 125.9               |                                              | 123.9               |                                              |                     |
| 12   |                                              | 169.0               |                                              | 169.7               |                                              |                     |
| 13   | 1.87, d (2.0)                                | 8.8                 | 1.82, d (2.0)                                | 8.2                 |                                              |                     |
| 14   | 1.23, s                                      | 23.7                | 1.21, s                                      | 28.6                | 1.92, s                                      | 22.6                |
| 15   | 0.93, d (6.9)                                | 18.0                | 0.91, d (6.9)                                | 19.4                | 0.95, d (7.0)                                | 15.8                |
| OH-1 |                                              |                     | 5.01, d (4.7)                                |                     |                                              |                     |

**Table 2.** <sup>1</sup>H NMR (600 MHz) and <sup>13</sup>C NMR (150 MHz) data for **4–6** (Recorded in DMSO-*d*<sub>6</sub>)

| No.                | <b>4</b>                                     |                     | <b>5</b>                                     |                     | <b>6</b>                                     |                     |
|--------------------|----------------------------------------------|---------------------|----------------------------------------------|---------------------|----------------------------------------------|---------------------|
|                    | $\delta_{\text{H}}$ , mult ( <i>J</i> in Hz) | $\delta_{\text{C}}$ | $\delta_{\text{H}}$ , mult ( <i>J</i> in Hz) | $\delta_{\text{C}}$ | $\delta_{\text{H}}$ , mult ( <i>J</i> in Hz) | $\delta_{\text{C}}$ |
| 1                  |                                              | 97.3                |                                              | 108.5               |                                              | 73.9                |
| 2                  | 2.13, m                                      | 34.3                | 1.86, m                                      | 39.7                | 2.13, ddd (15.1, 10.3, 2.1)                  | 29.4                |
|                    | 1.77, m                                      |                     | 1.63, m                                      |                     | 1.45, m                                      |                     |
| 3                  | 2.00, overlap                                | 31.7                | 1.68, m                                      | 32.0                | 1.81, m                                      | 30.2                |
|                    | 1.49, m                                      |                     | 1.15, m                                      |                     | 1.25, m                                      |                     |
| 4                  | 2.40, m                                      | 34.6                | 1.50, m                                      | 40.3                | 2.27, m                                      | 37.3                |
| 5                  | 2.60, m                                      | 43.8                | 1.75, overlap                                | 53.0                | 1.73, dd (12.5, 6.7)                         | 48.7                |
| 6                  | 2.26, dd (16.2, 7.9)                         | 28.7                | 1.75, overlap                                | 32.3                | $\alpha$ 1.98, m                             | 21.7                |
|                    | 2.00, overlap                                |                     | 1.60, m                                      |                     | $\beta$ 1.16, m                              |                     |
| 7                  |                                              | 172.2               |                                              | 90.6                | 2.66, m                                      | 50.8                |
| 8                  |                                              | 171.4               |                                              | 204.8               | 4.05, m                                      | 79.9                |
| 9                  | 5.88, q (1.5)                                | 116.2               | 5.52, brs                                    | 102.1               | $\alpha$ 1.87, t (12.4)                      | 41.1                |
|                    |                                              |                     |                                              |                     | $\beta$ 2.46, dd (12.4, 1.4)                 |                     |
| 10                 |                                              | 170.8               |                                              | 188.5               |                                              | 59.5                |
| 11                 |                                              |                     | 1.97, m                                      | 35.5                |                                              | 140.4               |
| 12                 |                                              |                     | 4.30, dd (10.3, 2.8)                         | 58.7                |                                              | 169.6               |
|                    |                                              |                     | 3.74, dd (10.3, 3.0)                         |                     |                                              |                     |
| 13                 |                                              |                     | 4.17, dd (11.2, 2.8)                         | 62.0                | 5.97, d (3.3)                                | 118.1               |
|                    |                                              |                     | 3.94, dd (11.2, 7.3)                         |                     | 5.63, d (3.3)                                |                     |
| 14                 | 2.00, d (1.5)                                | 12.6                | 2.25, brs                                    | 16.6                | 1.29, s                                      | 21.4                |
| 15                 | 0.91, d (7.2)                                | 16.4                | 0.92, d (6.5)                                | 18.0                | 1.04, d (6.8)                                | 15.4                |
| 7-OCH <sub>3</sub> | 3.53, s                                      | 51.4                |                                              |                     |                                              |                     |



**Table 3.** Calculated  ${}^4J_{C-H}$

|                               | ${}^4J_{C-H}$ |
|-------------------------------|---------------|
| $\delta_H 3.74/\delta_C 53.0$ | 0.164393D+01  |
| $\delta_H 3.94/\delta_C 53.0$ | 0.196008D+00  |
| $\delta_H 4.17/\delta_C 53.0$ | -0.355825D+00 |
| $\delta_H 4.30/\delta_C 53.0$ | -0.164829D-01 |

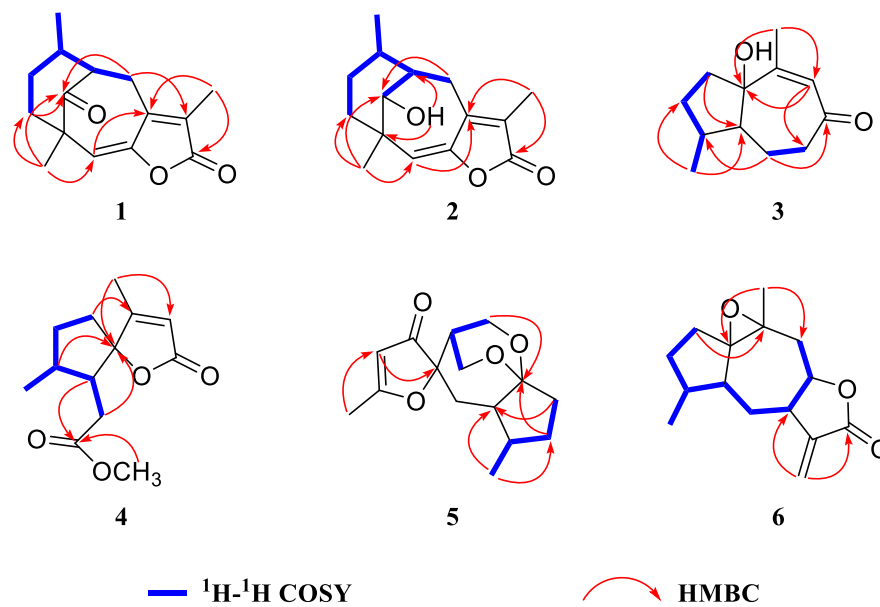

**Fig. S4.** Key  ${}^1H$ - ${}^1H$  COSY (blue line) and HMBC (red arrow) correlations for compounds 1–6

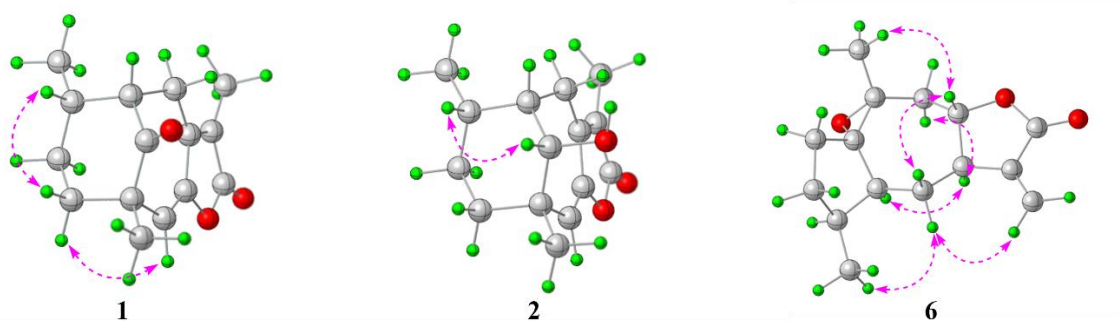

**Fig. S5.** Key NOE correlations for compounds 1, 2 and 6

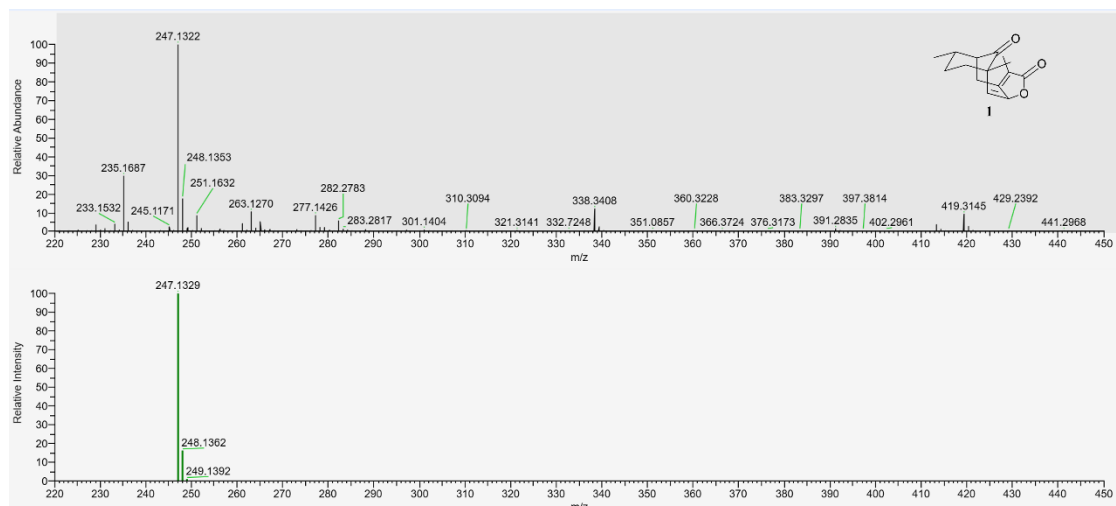

**Fig. S6.** The HR-ESIMS spectrum of the new compound **1**

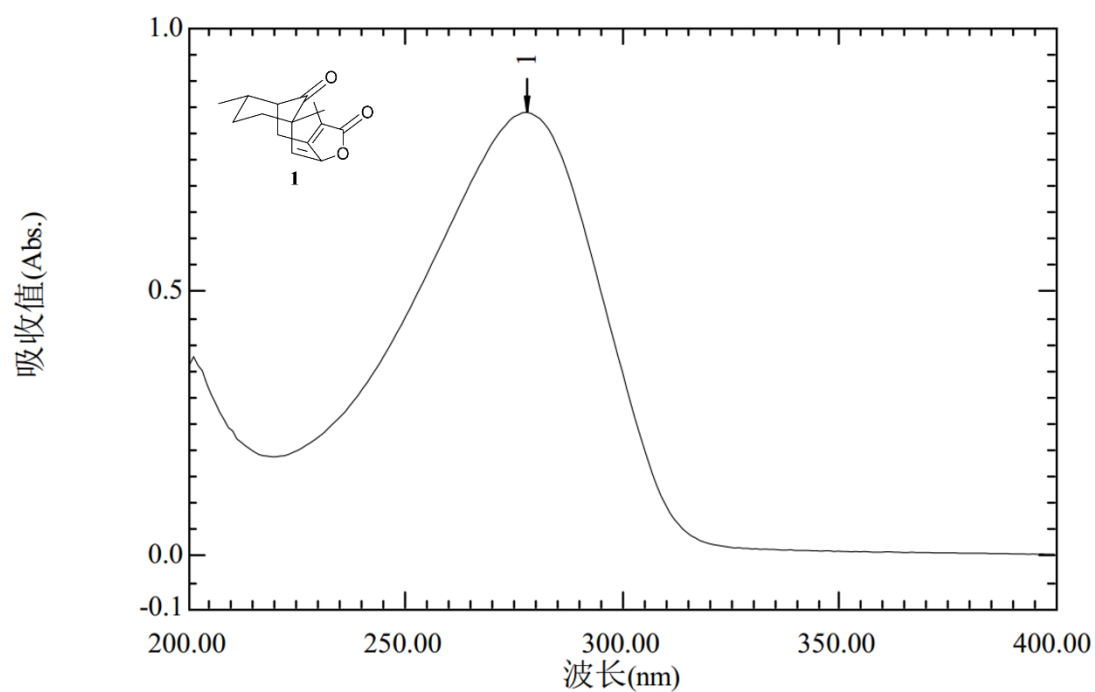

**Fig. S7.** The UV spectrum of the new compound **1**

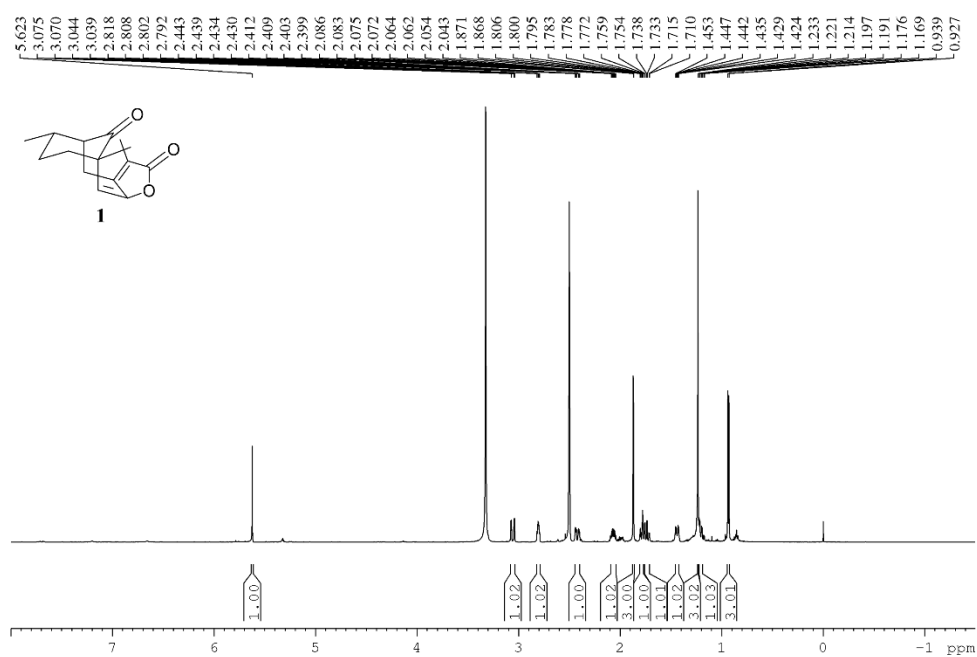

**Fig. S8.**  $^1\text{H}$  NMR (600 MHz,  $\text{DMSO-}d_6$ ) spectrum of the new compound **1**

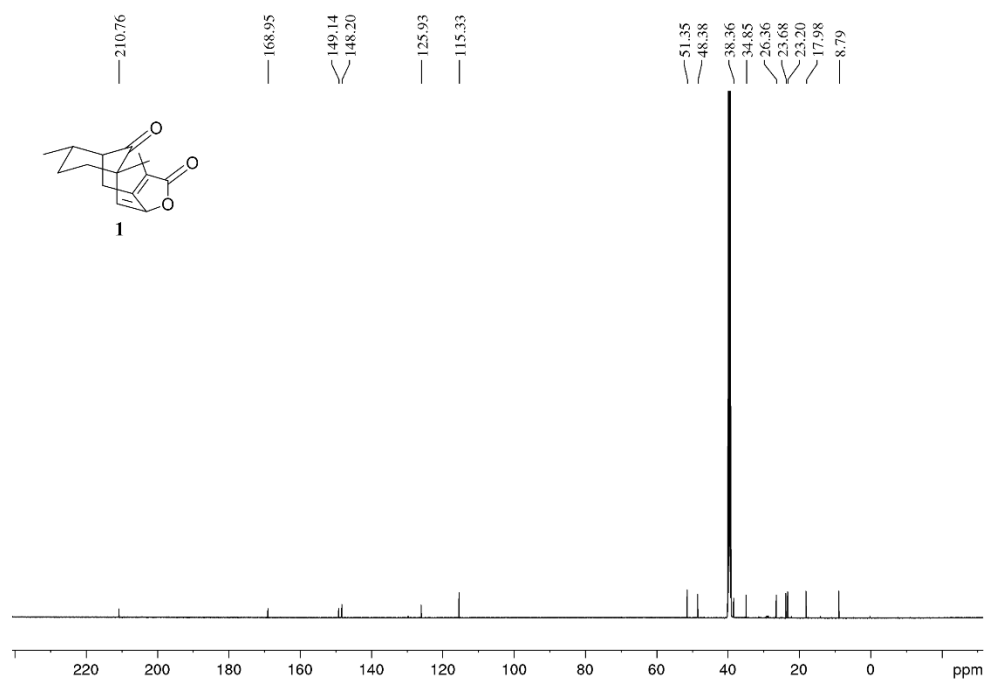

**Fig. S9.**  $^{13}\text{C}$  NMR (150 MHz,  $\text{DMSO-}d_6$ ) spectrum of the new compound **1**

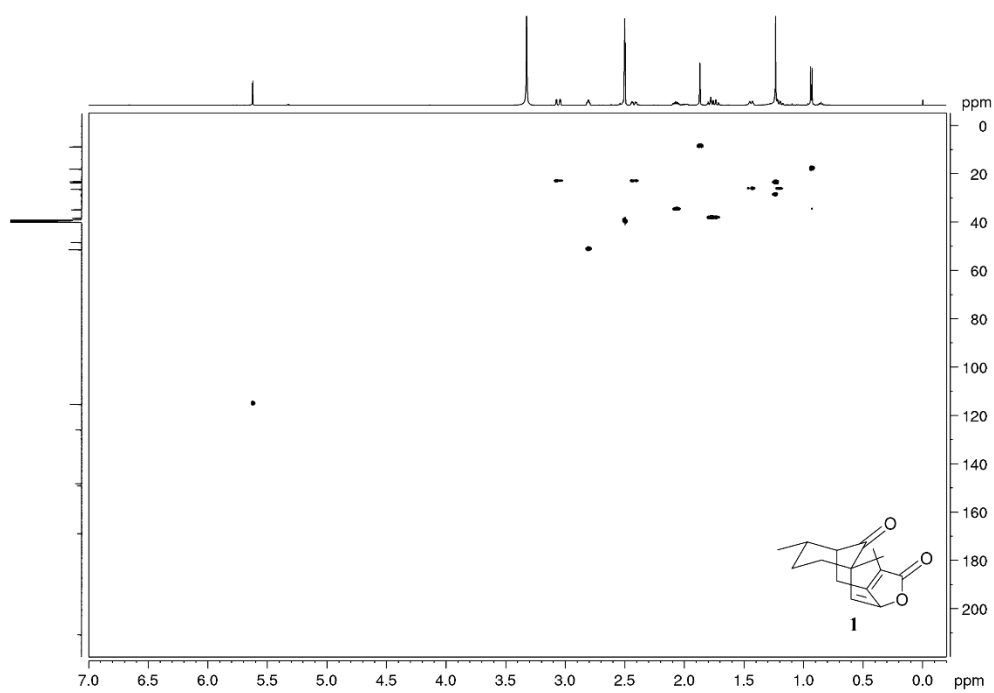

**Fig. S10.** HSQC (600 MHz,  $\text{DMSO-}d_6$ ) spectrum of the new compound **1**

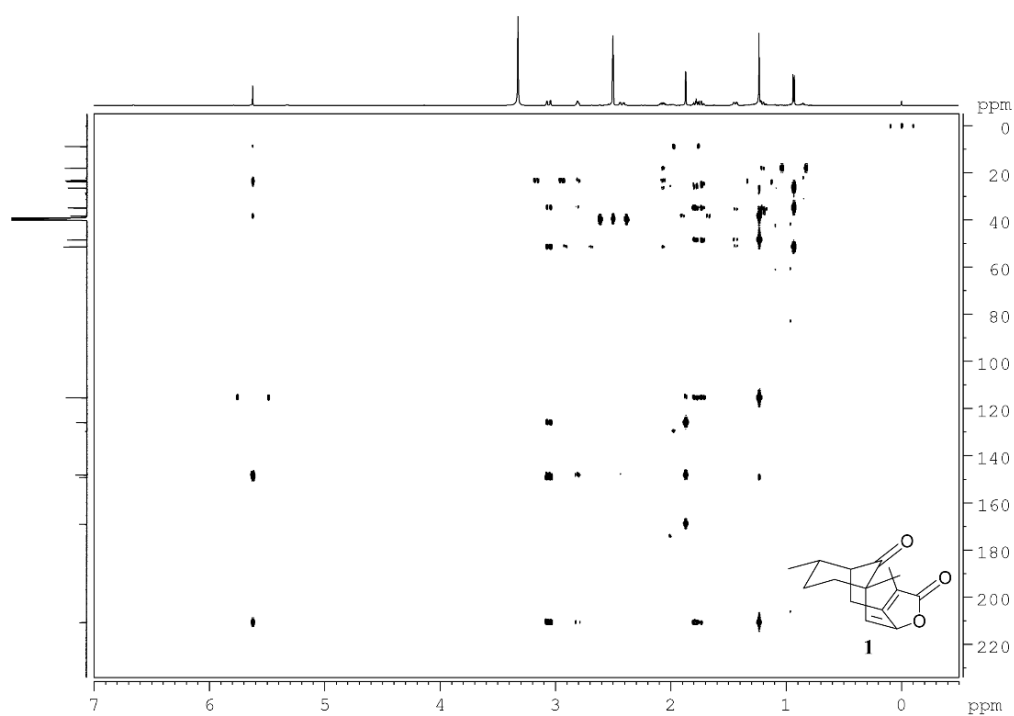

**Fig. S11.** HMBC (600 MHz,  $\text{DMSO-}d_6$ ) spectrum of the new compound **1**

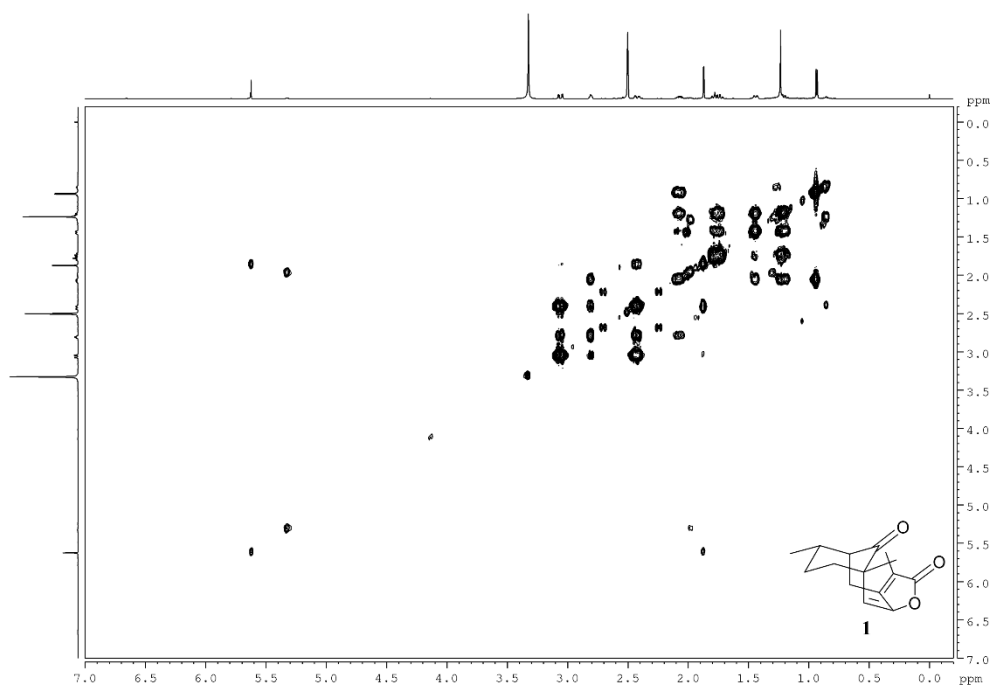

**Fig. S12.** <sup>1</sup>H-<sup>1</sup>H COSY (600 MHz, DMSO-*d*<sub>6</sub>) spectrum of the new compound **1**

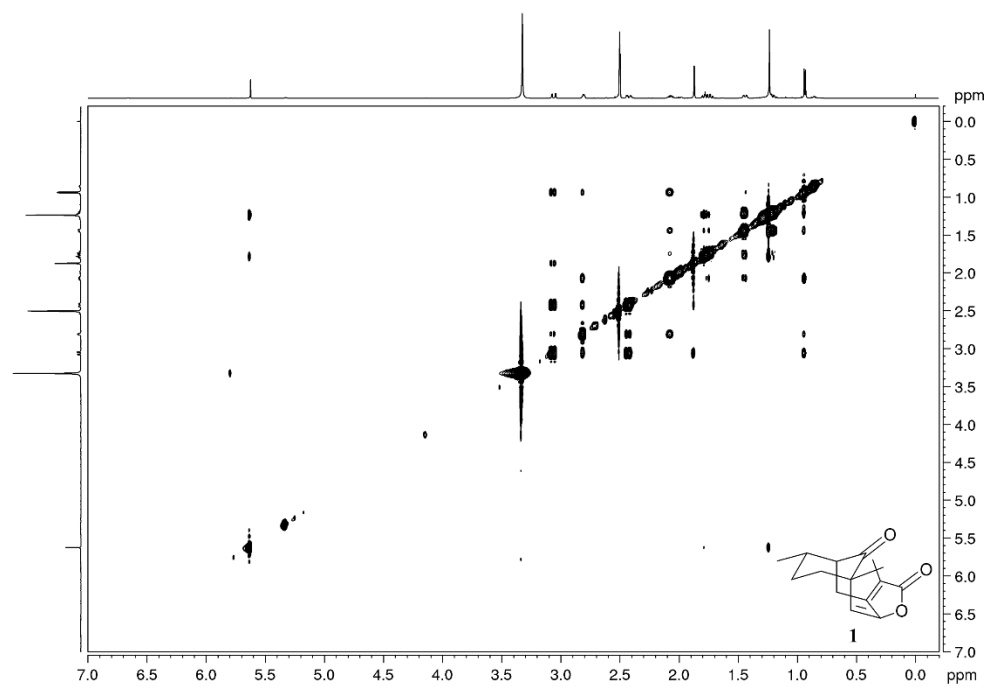

**Fig. S13.** NOESY (600 MHz, DMSO-*d*<sub>6</sub>) spectrum of the new compound **1**

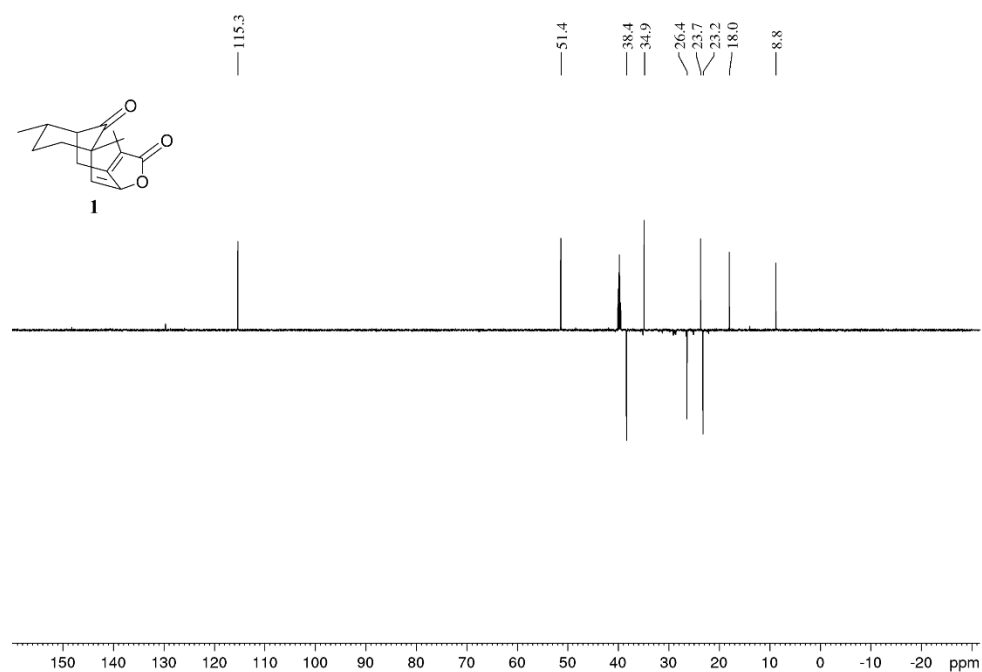

**Fig. S14.** DEPT (600 MHz, DMSO-*d*<sub>6</sub>) spectrum of the new compound **1**

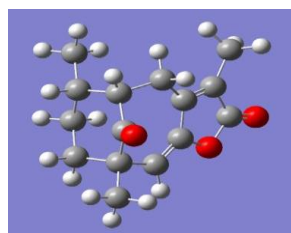

**1-1 (100% )**

Energy: -808.3625568 hartree

**Fig. S15.** Most stable conformers of the new compound **1** in solvated model calculations at the B3LYP/6-311++G (2d, p) level in ECD calculation

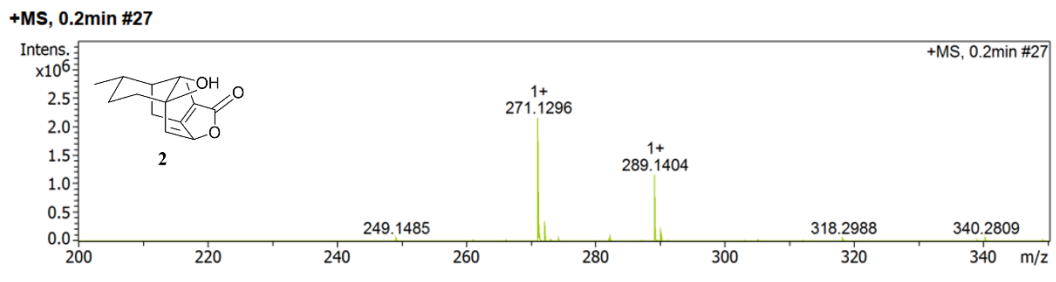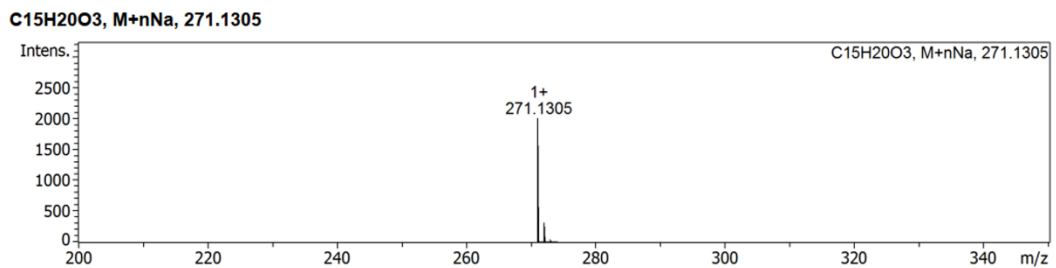

**Fig. S16.** The HR-ESIMS spectrum of the new compound **2**

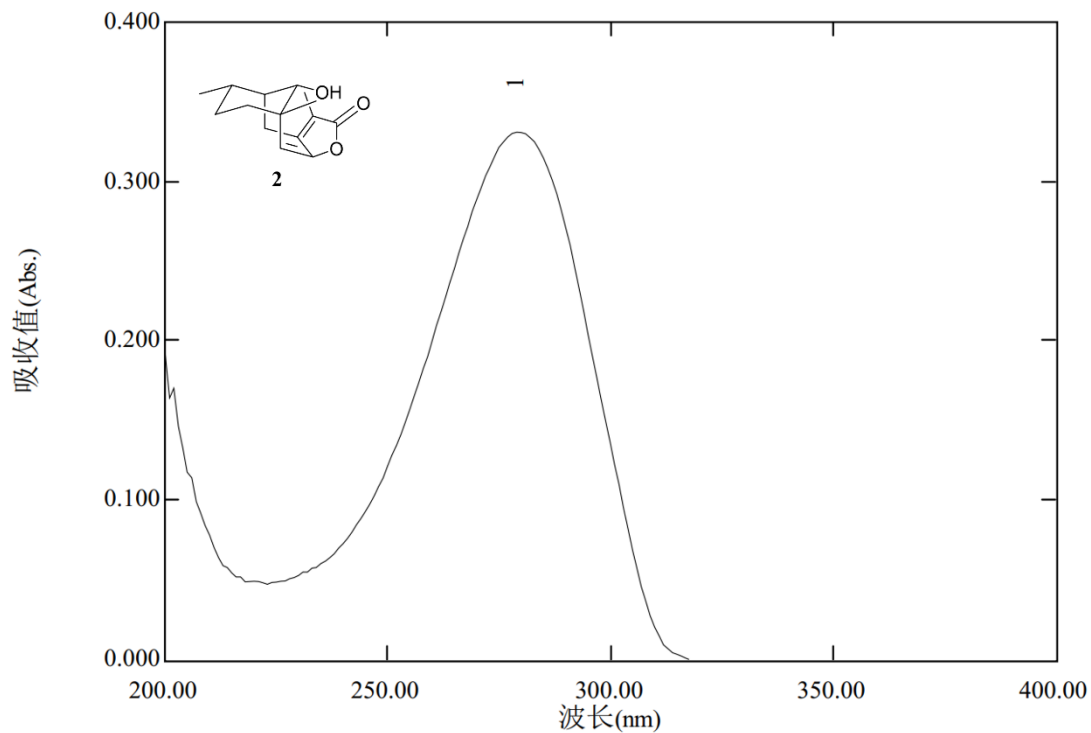

**Fig. S17.** The UV spectrum of the new compound **2**

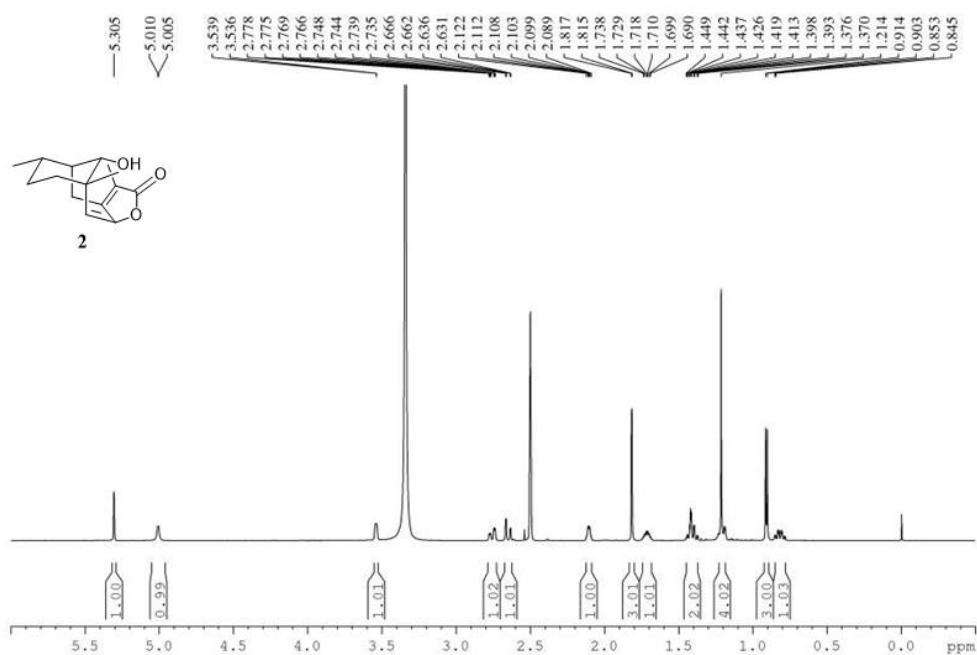

**Fig. S18.** <sup>1</sup>H NMR (600 MHz, DMSO-*d*<sub>6</sub>) spectrum of the new compound **2**

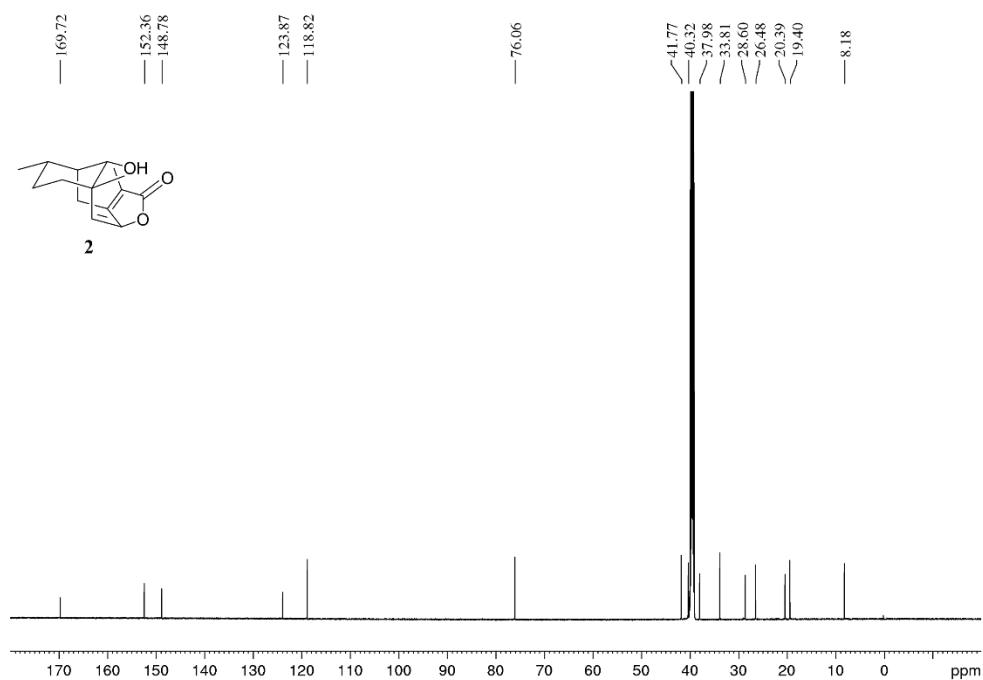

**Fig. S19.** <sup>13</sup>C NMR (150 MHz, DMSO-*d*<sub>6</sub>) spectrum of the new compound **2**



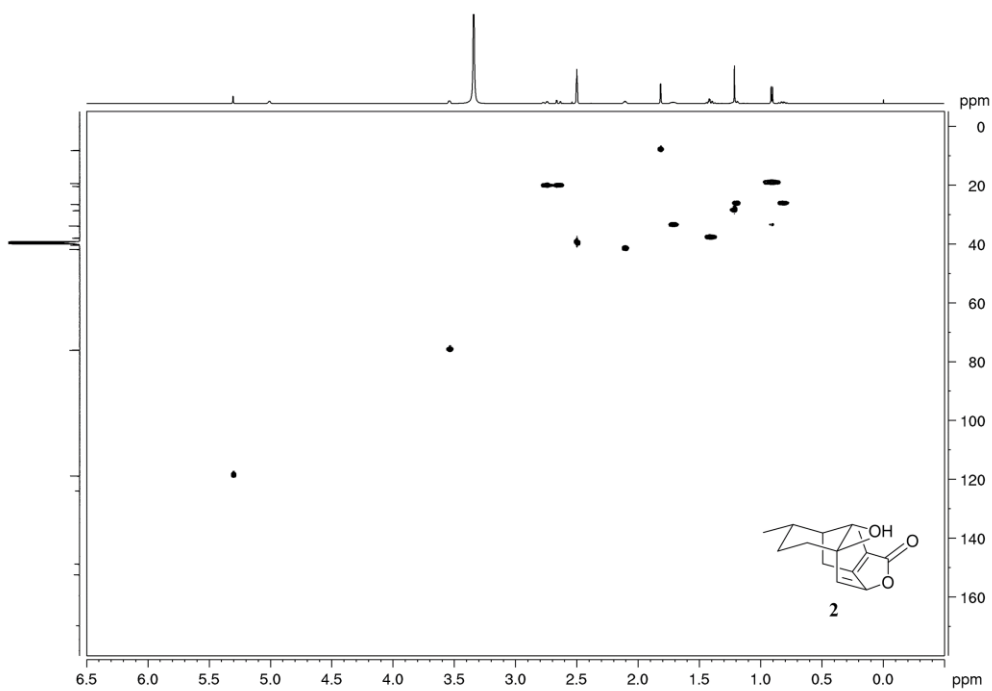

**Fig. S20.** HSQC (600 MHz, DMSO-*d*<sub>6</sub>) spectrum of the new compound **2**

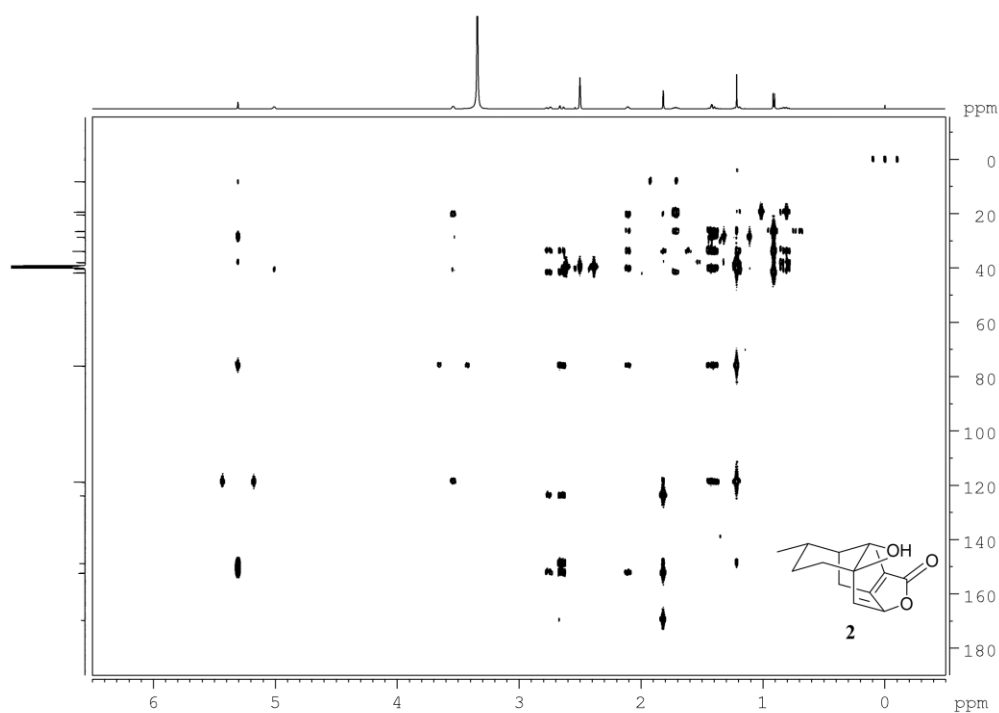

**Fig. S21.** HMBC (600 MHz, DMSO-*d*<sub>6</sub>) spectrum of the new compound **2**

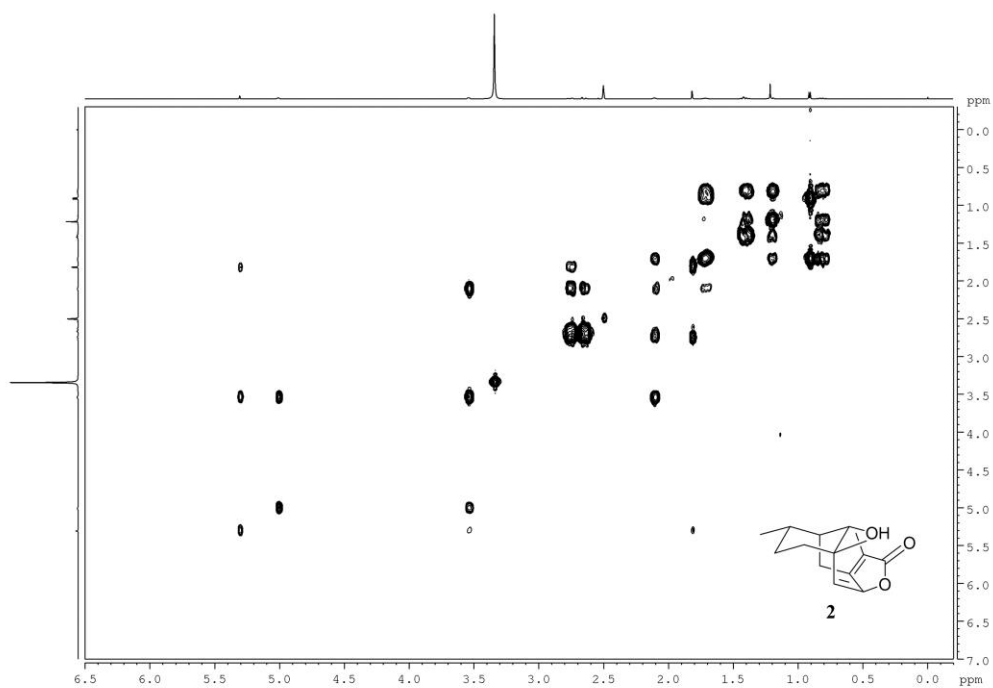

**Fig. S22.**  $^1\text{H}$ - $^1\text{H}$  COSY (600 MHz,  $\text{DMSO-}d_6$ ) spectrum of the new compound **2**

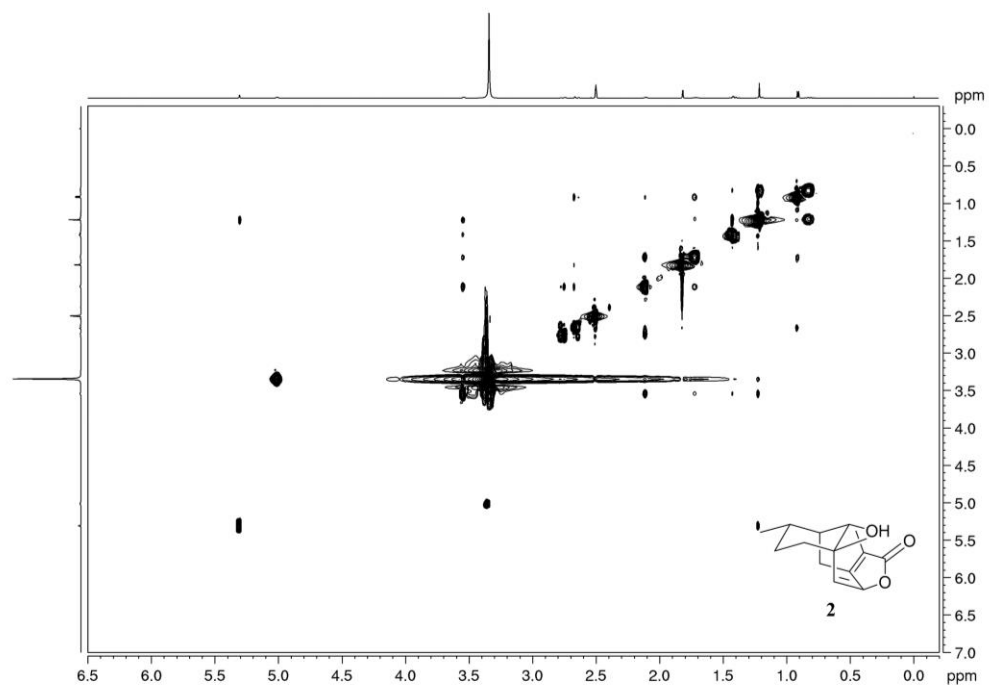

**Fig. S23.** NOESY (600 MHz,  $\text{DMSO-}d_6$ ) spectrum of the new compound **2**

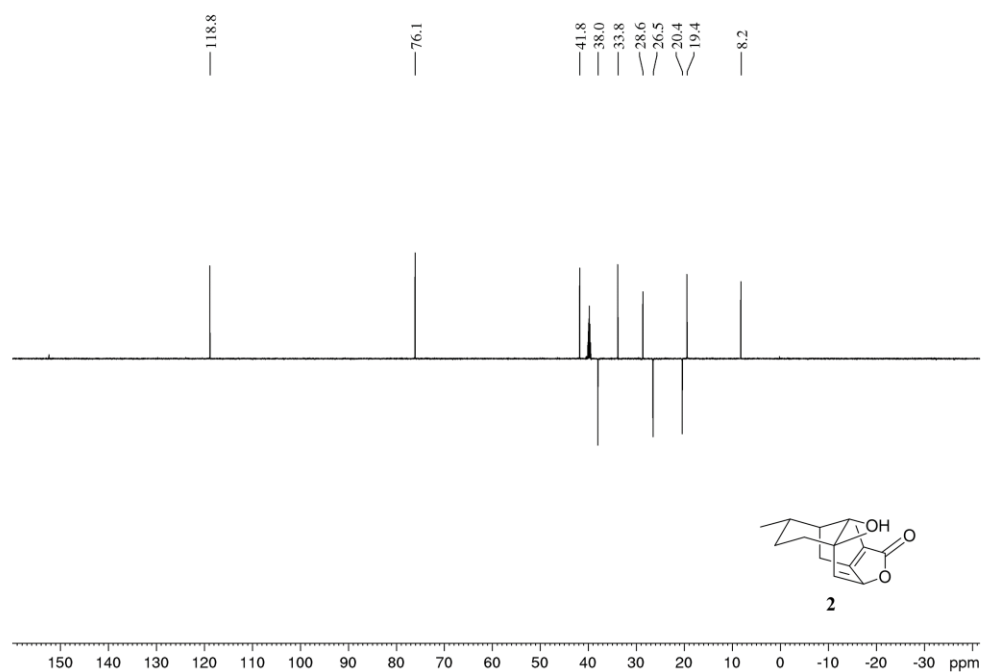

**Fig. S24.** DEPT (600 MHz, DMSO- $d_6$ ) spectrum of the new compound **2**

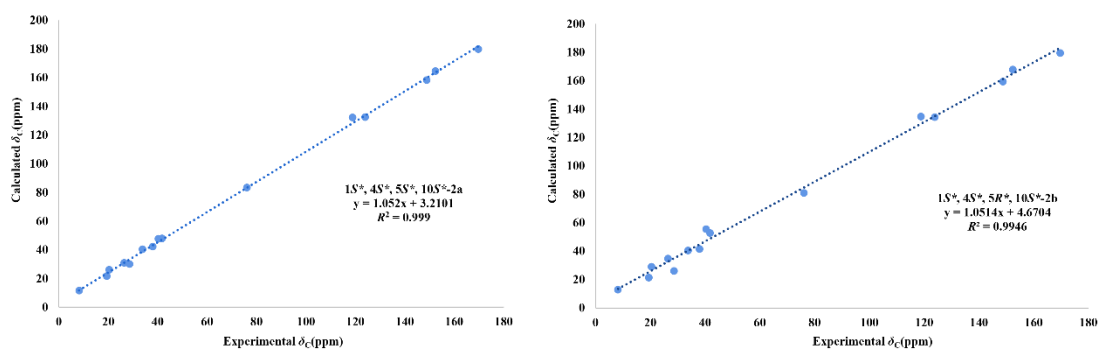

**Fig. S25.** Linear correlation between the experimental and calculated  $^{13}\text{C}$  NMR chemical shifts of **2a** and **2b**

| Isomer N° |      |          | 1           | 2           |
|-----------|------|----------|-------------|-------------|
| DP4+ (%)  |      | H data   | 100.00%     | 0.00%       |
|           |      | C data   | 100.00%     | 0.00%       |
|           |      | All data | 100.00%     | 0.00%       |
| Type      | sp2? | Exp      | 1           | 2           |
| c         |      | 41.78    | 47.92709338 | 52.7830081  |
| c         |      | 33.82    | 40.32384362 | 40.38680259 |
| c         |      | 26.48    | 30.85683922 | 34.69021358 |
| c         |      | 37.98    | 42.23818782 | 41.45057004 |
| c         |      | 40.32    | 47.6894924  | 55.43906512 |
| c         | X    | 188.82   | 132.1975    | 134.7038    |
| c         | X    | 148.78   | 158.2973    | 159.2459942 |
| c         | X    | 152.37   | 164.6176598 | 167.71      |
| c         |      | 20.39    | 26.0523083  | 29.04153242 |
| c         |      | 76.07    | 83.45225444 | 80.9226362  |
| c         | X    | 123.87   | 132.5053    | 134.382     |
| c         | X    | 169.72   | 179.766     | 179.53      |
| c         |      | 8.18     | 11.63261366 | 12.84013954 |
| c         |      | 19.4     | 21.6354636  | 21.28631617 |
| c         |      | 28.61    | 30.01095571 | 25.98118273 |
| H         |      | 2.11     | 2.296328295 | 2.21580928  |
| H         |      | 1.71     | 1.895489101 | 2.134454369 |
| H         |      | 0.82     | 1.035370094 | 1.345006249 |
| H         |      | 1.21     | 1.34386945  | 2.388830746 |
| H         |      | 1.41     | 1.682204054 | 2.188009952 |
| H         |      | 1.41     | 1.653755758 | 1.707817718 |
| H         | X    | 5.31     | 5.886       | 6.1052      |
| H         |      | 2.65     | 2.992609423 | 2.769609177 |
| H         |      | 2.76     | 2.973525638 | 2.857430606 |
| H         |      | 3.54     | 3.952846551 | 3.557253856 |
| H         |      | 1.82     | 2.02513362  | 2.066246594 |
| H         |      | 1.82     | 2.02513362  | 2.066246594 |
| H         |      | 1.82     | 2.02513362  | 2.066246594 |
| H         |      | 0.91     | 1.116983902 | 1.060651101 |
| H         |      | 0.91     | 1.116983902 | 1.060651101 |
| H         |      | 0.91     | 1.116983902 | 1.060651101 |
| H         |      | 1.21     | 1.421749289 | 1.306702166 |
| H         |      | 1.21     | 1.421749289 | 1.306702166 |
| H         |      | 1.21     | 1.421749289 | 1.306702166 |

**Fig. S26.** Results of custom DP4+ analysis of **2a** and **2b**

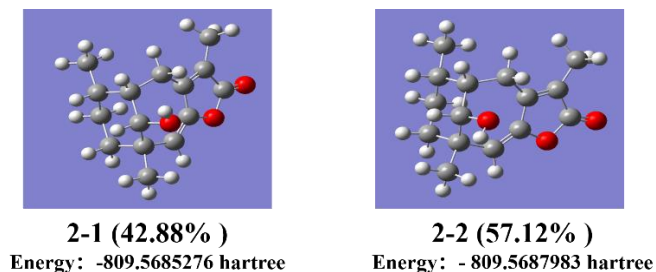

**Fig. S27.** Most stable conformers of the new compound **2** in solvated model calculations at the B3LYP/6-311++G (2d, p) level in ECD calculation

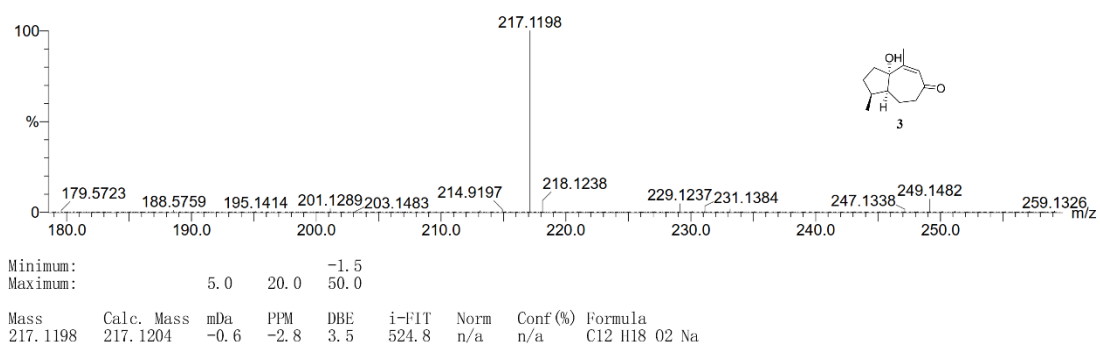

**Fig. S28.** The HR-ESIMS spectrum of the new compound **3**

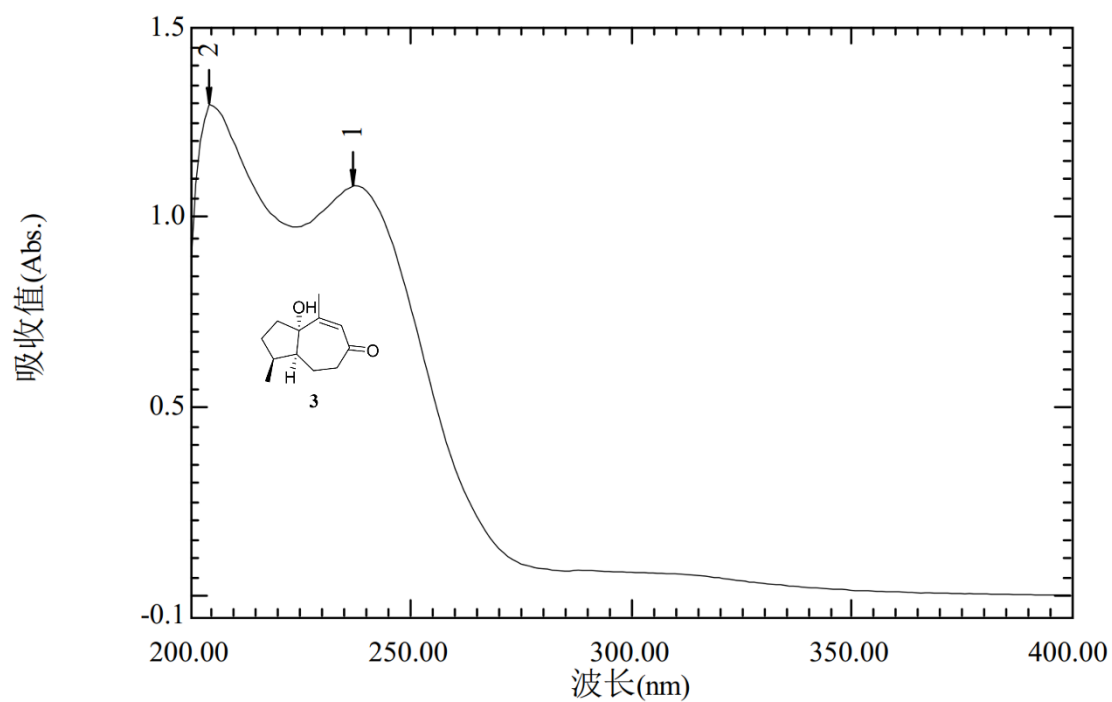

**Fig. S29.** The UV spectrum of the new compound **3**

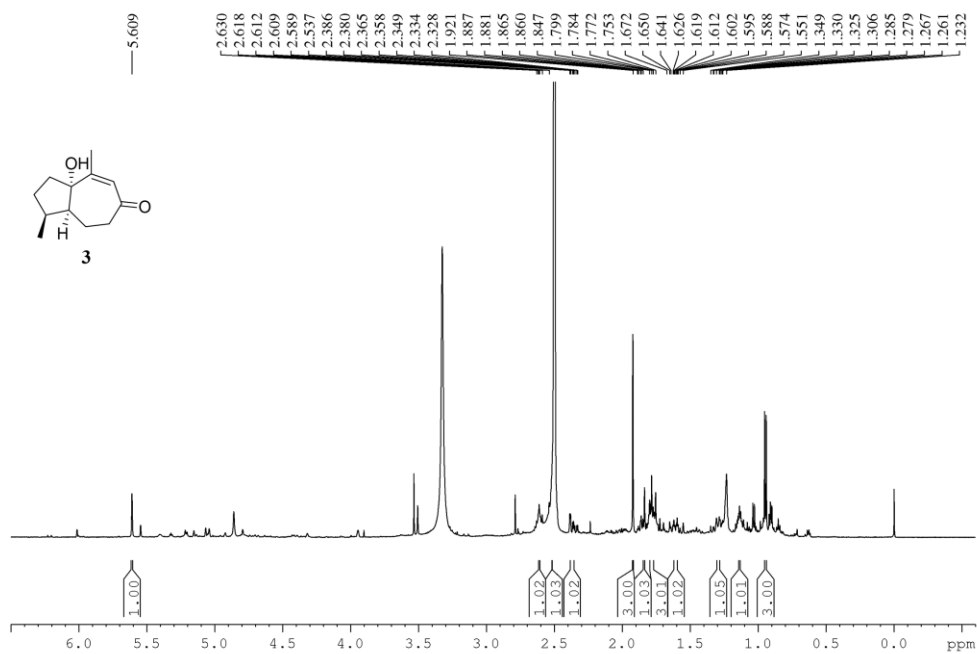

**Fig. S30.** <sup>1</sup>H NMR (600 MHz, DMSO-*d*<sub>6</sub>) spectrum of the new compound **3**

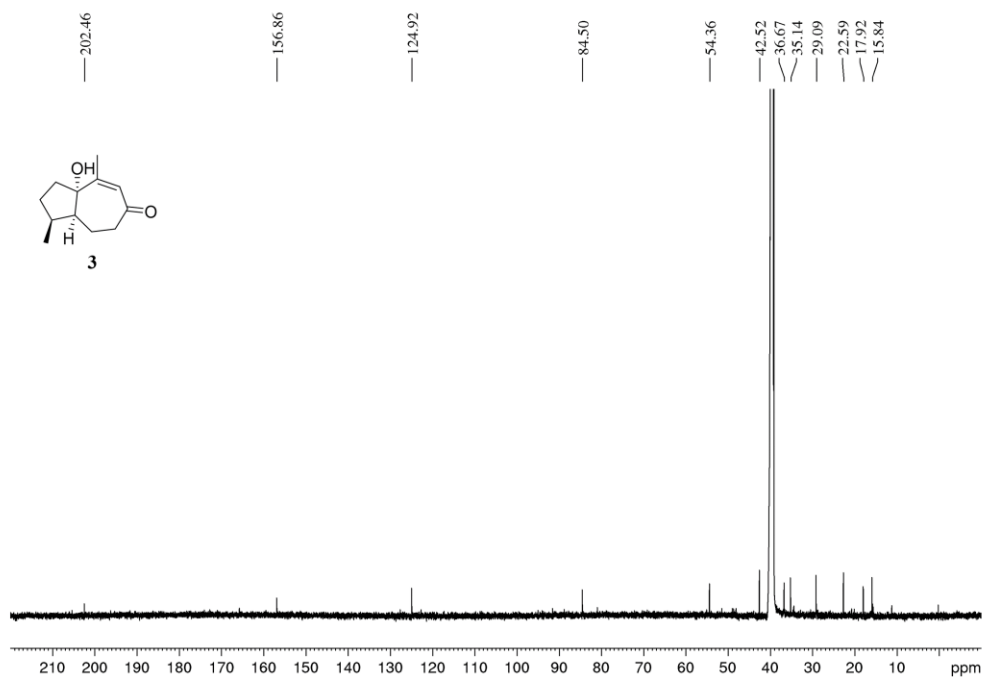

**Fig. S31.** <sup>13</sup>C NMR (150 MHz, DMSO-*d*<sub>6</sub>) spectrum of the new compound **3**

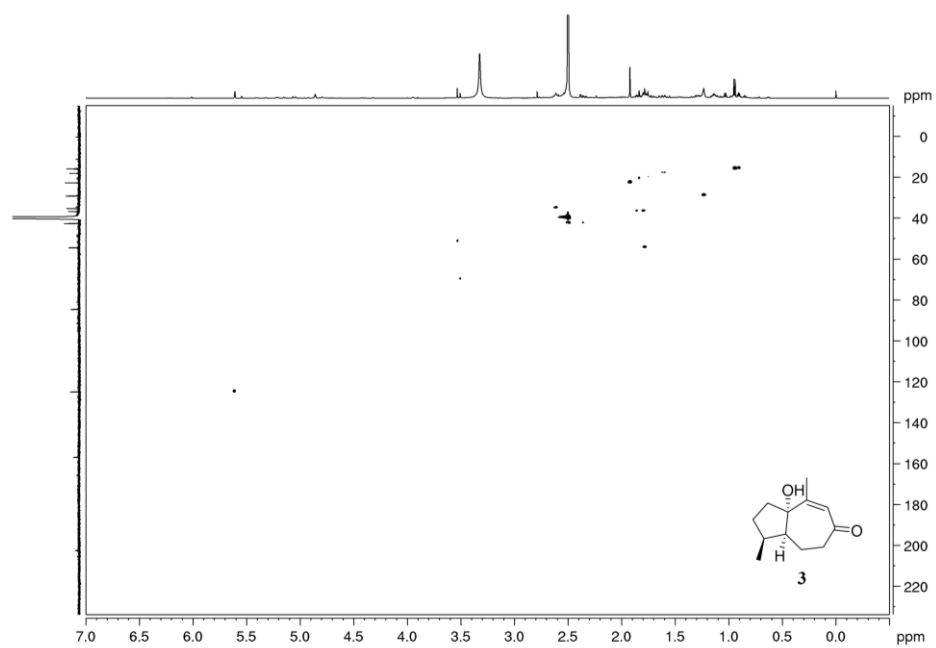

**Fig. S32.** HSQC (600 MHz, DMSO-*d*<sub>6</sub>) spectrum of the new compound **3**

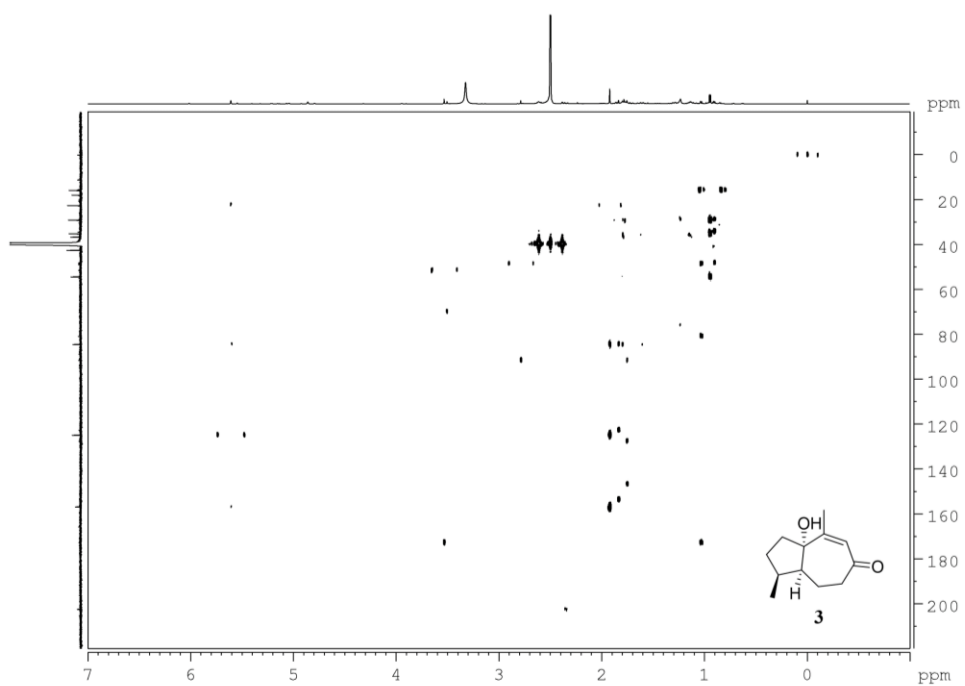

**Fig. S33.** HMBC (600 MHz, DMSO-*d*<sub>6</sub>) spectrum of the new compound **3**

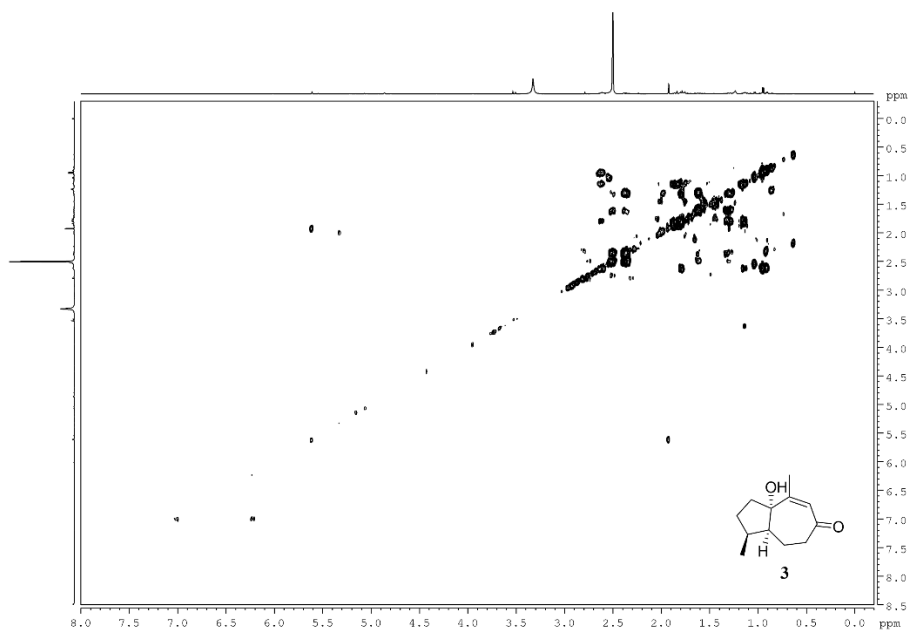

**Fig. S34.** <sup>1</sup>H-<sup>1</sup>H COSY (600 MHz, DMSO-*d*<sub>6</sub>) spectrum of the new compound **3**

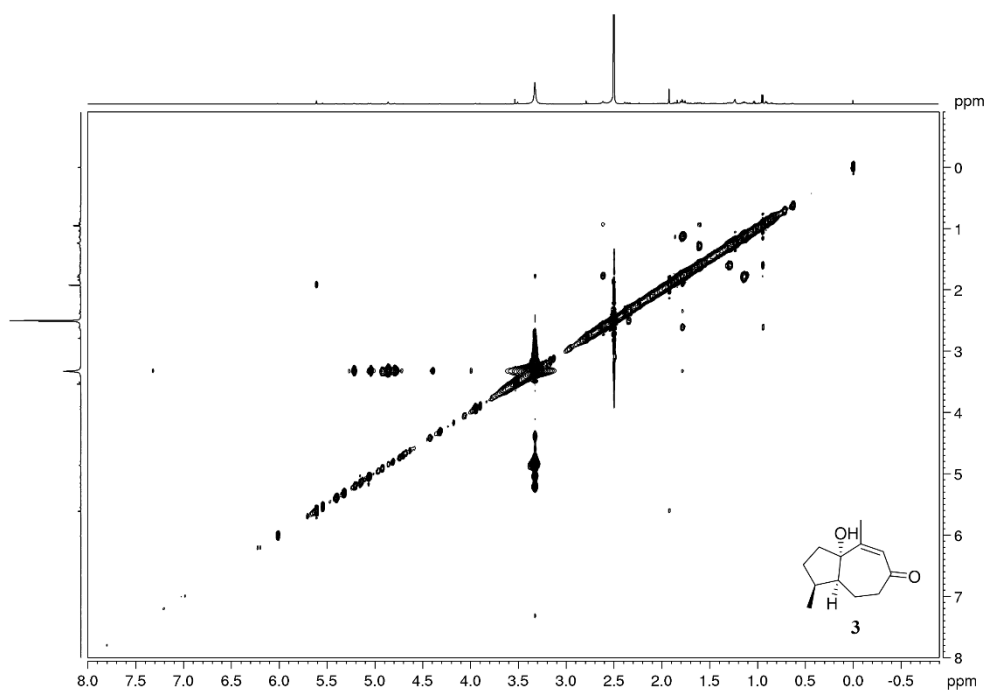

**Fig. S35.** NOESY (600 MHz, DMSO-*d*<sub>6</sub>) spectrum of the new compound **3**



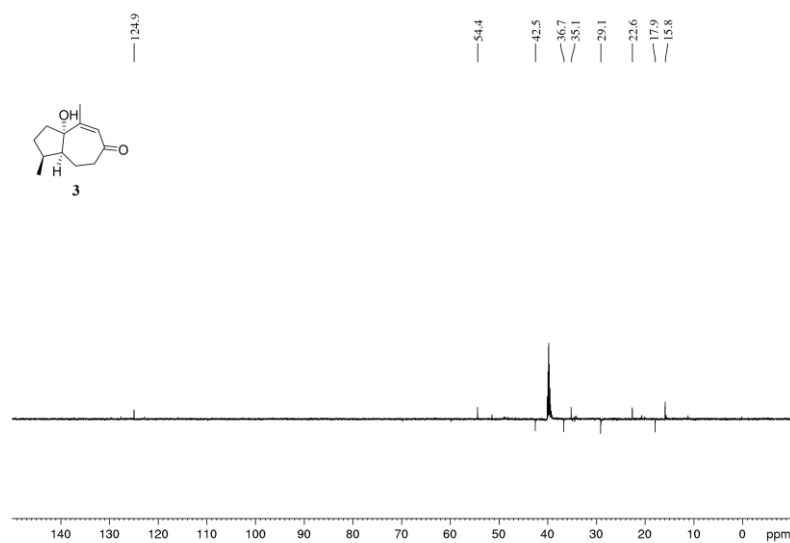

**Fig. S36.** DEPT (600 MHz, DMSO- $d_6$ ) spectrum of the new compound **3**

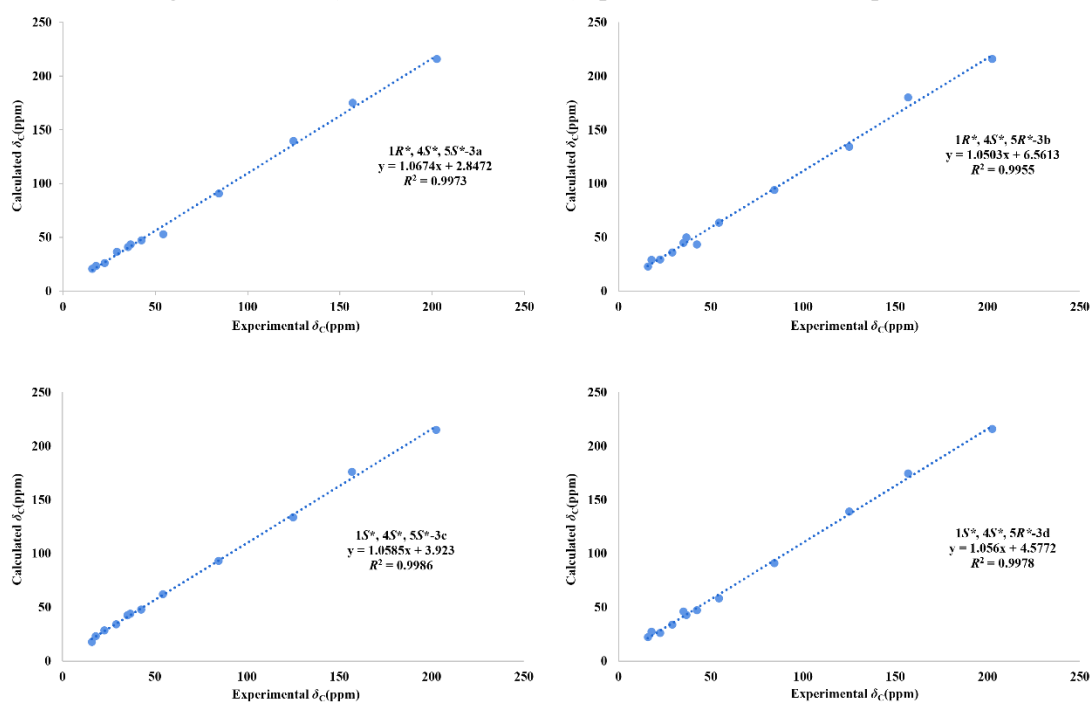

**Fig. S37.** Linear correlation between the experimental and calculated  $^{13}\text{C}$  NMR chemical shifts of **3a–3d**

| Isomer N° |      |        | 1           | 2           | 3          | 4          |       |
|-----------|------|--------|-------------|-------------|------------|------------|-------|
| DP4+ (%)  |      |        | H data      | 0.00%       | 0.00%      | 100.00%    | 0.00% |
|           |      |        | C data      | 0.03%       | 0.00%      | 99.97%     | 0.00% |
|           |      |        | All data    | 0.00%       | 0.00%      | 100.00%    | 0.00% |
| Type      | sp2? | Exp    | 1           | 2           | 3          | 4          |       |
| c         |      | 84.5   | 90.88131146 | 93.9378265  | 93.1949141 | 91.1672993 |       |
| c         |      | 36.68  | 43.2798552  | 50.06556391 | 43.9558827 | 42.9145345 |       |
| c         |      | 29.09  | 36.47330793 | 35.90512107 | 34.1962814 | 33.751876  |       |
| c         |      | 35.15  | 41.06627015 | 44.74938686 | 42.6358797 | 46.101396  |       |
| c         |      | 54.36  | 52.82399538 | 63.74051228 | 62.1016622 | 58.1892175 |       |
| c         |      | 17.92  | 23.45182922 | 29.14329313 | 23.2305421 | 27.2871102 |       |
| c         |      | 42.53  | 47.3287964  | 43.41739445 | 47.9991086 | 47.1304378 |       |
| c         | X    | 202.49 | 215.77      | 215.81      | 215.04     | 215.68     |       |
| c         | X    | 124.93 | 139.53      | 134.16      | 133.68     | 138.87     |       |
| c         | X    | 156.87 | 174.89      | 179.98      | 175.87     | 174.43     |       |
| c         |      | 22.6   | 26.22183099 | 29.395264   | 28.3922752 | 26.083596  |       |
| c         |      | 15.85  | 20.90537054 | 22.81384225 | 17.8978436 | 22.3704216 |       |
| H         |      | 1.84   | 2.046990346 | 2.147412096 | 2.12797037 | 2.0471935  |       |
| H         |      | 1.79   | 1.846564728 | 1.673607917 | 2.14119412 | 2.03485025 |       |
| H         |      | 1.79   | 2.102216087 | 1.943946527 | 2.02390403 | 1.39367663 |       |
| H         |      | 1.14   | 1.641366417 | 1.75743988  | 1.47283473 | 2.26004802 |       |
| H         |      | 2.61   | 2.464347339 | 2.094829935 | 3.00292808 | 2.12705842 |       |
| H         |      | 1.79   | 2.226426811 | 1.900323047 | 2.02218666 | 1.67244366 |       |
| H         |      | 1.61   | 2.008026475 | 1.754672411 | 1.77388049 | 1.74134288 |       |
| H         |      | 1.3    | 1.81888491  | 1.937453489 | 1.58763717 | 2.12979107 |       |
| H         |      | 2.5    | 3.234331526 | 2.66378919  | 2.74485241 | 3.23195911 |       |
| H         |      | 2.37   | 2.539879844 | 2.512262398 | 2.61601831 | 2.52123313 |       |
| H         | X    | 5.61   | 6.3         | 6.25        | 6.15       | 6.28       |       |
| H         |      | 1.92   | 2.216583821 | 2.310476245 | 2.31084197 | 2.21899317 |       |
| H         |      | 1.92   | 2.216583821 | 2.310476245 | 2.31084197 | 2.21899317 |       |
| H         |      | 1.92   | 2.216583821 | 2.310476245 | 2.31084197 | 2.21899317 |       |
| H         |      | 0.95   | 1.116502535 | 1.271725273 | 1.14235633 | 1.11570546 |       |
| H         |      | 0.95   | 1.116502535 | 1.271725273 | 1.14235633 | 1.11570546 |       |
| H         |      | 0.95   | 1.116502535 | 1.271725273 | 1.14235633 | 1.11570546 |       |

Fig. S38. Results of custom DP4+ analysis of **3a–3d**

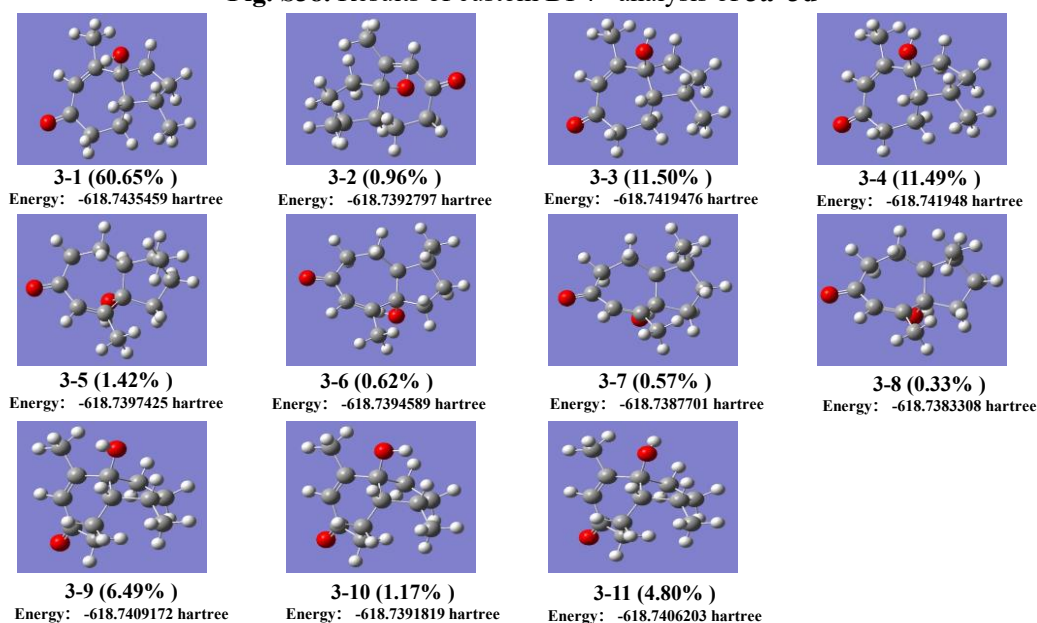

Fig. S39. Most stable conformers of the new compound **3** in solvated model calculations at the B3LYP/6-311++G (2d, p) level in ECD calculation

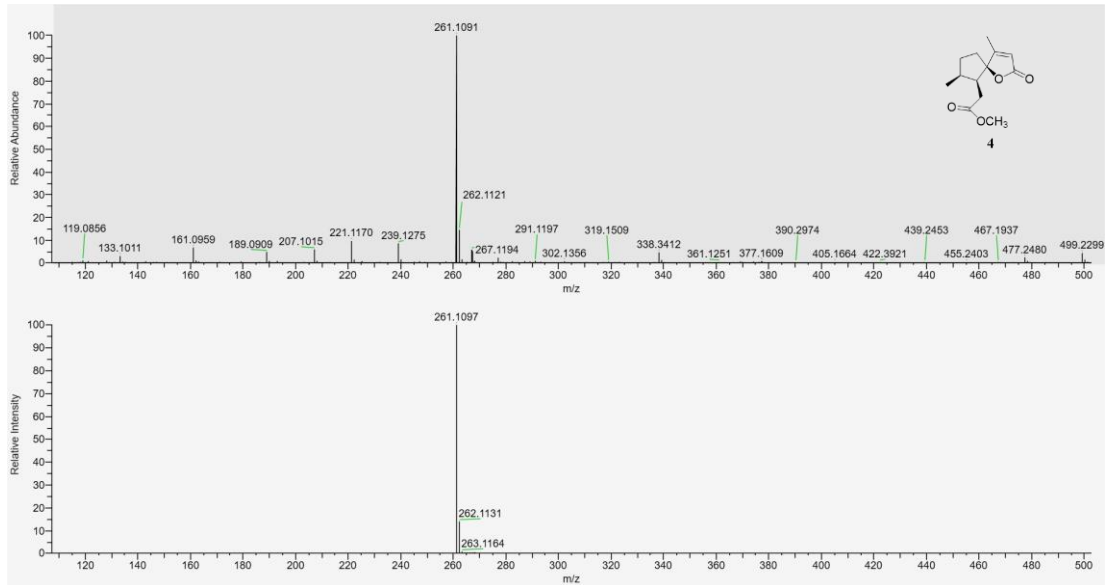

Fig. S40. The HR-ESIMS spectrum of the new compound 4

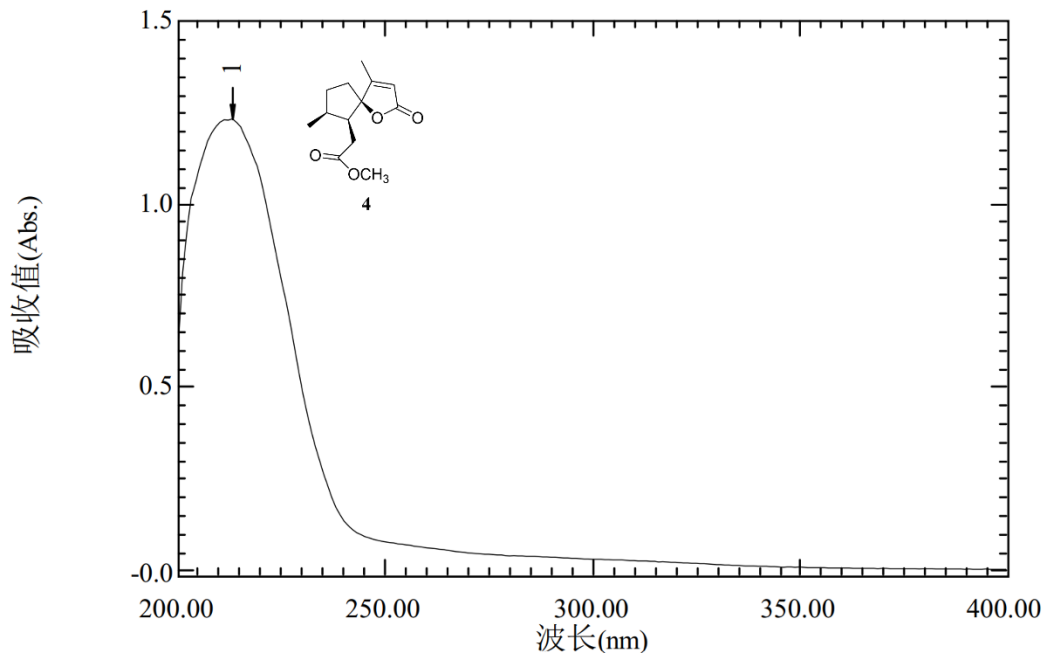

Fig. S41. The UV spectrum of the new compound 4

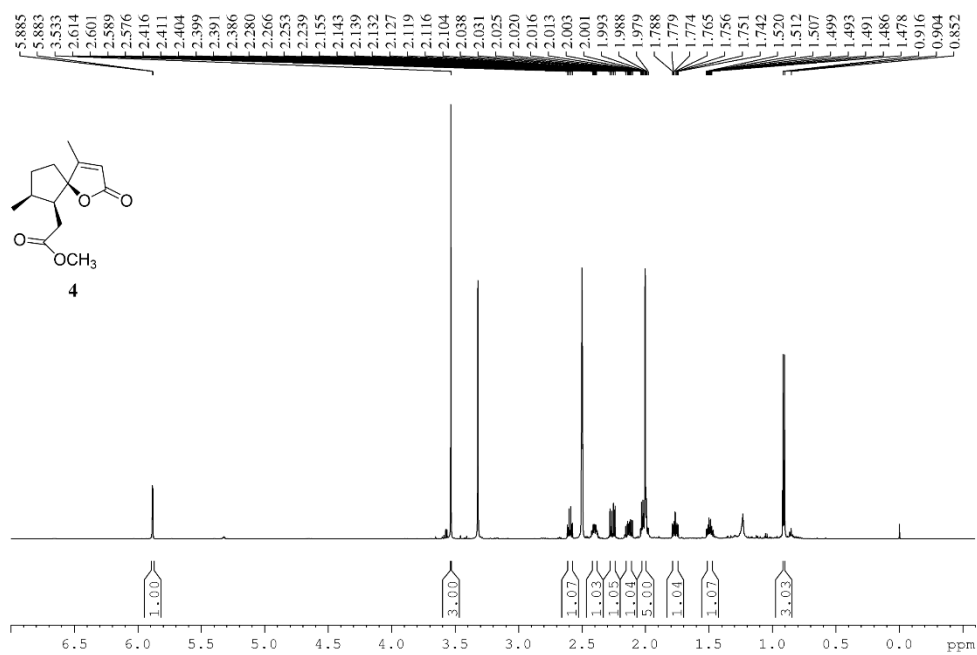

Fig. S42. <sup>1</sup>H NMR (600 MHz, DMSO-*d*<sub>6</sub>) spectrum of the new compound 4

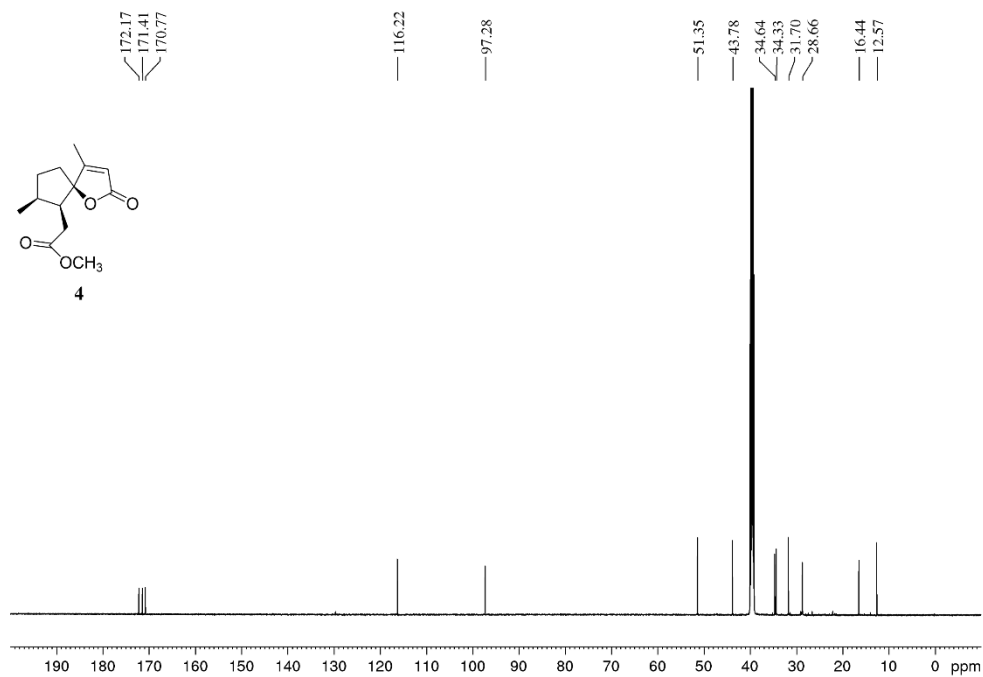

Fig. S43. <sup>13</sup>C NMR (150 MHz, DMSO-*d*<sub>6</sub>) spectrum of the new compound 4

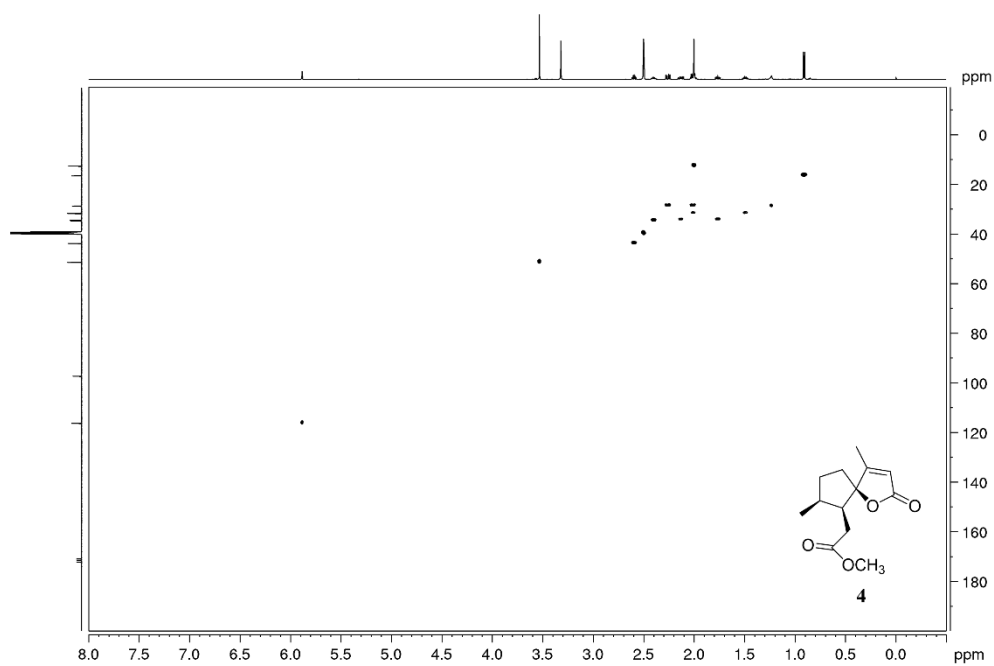

**Fig. S44.** HSQC (600 MHz, DMSO-*d*<sub>6</sub>) spectrum of the new compound **4**

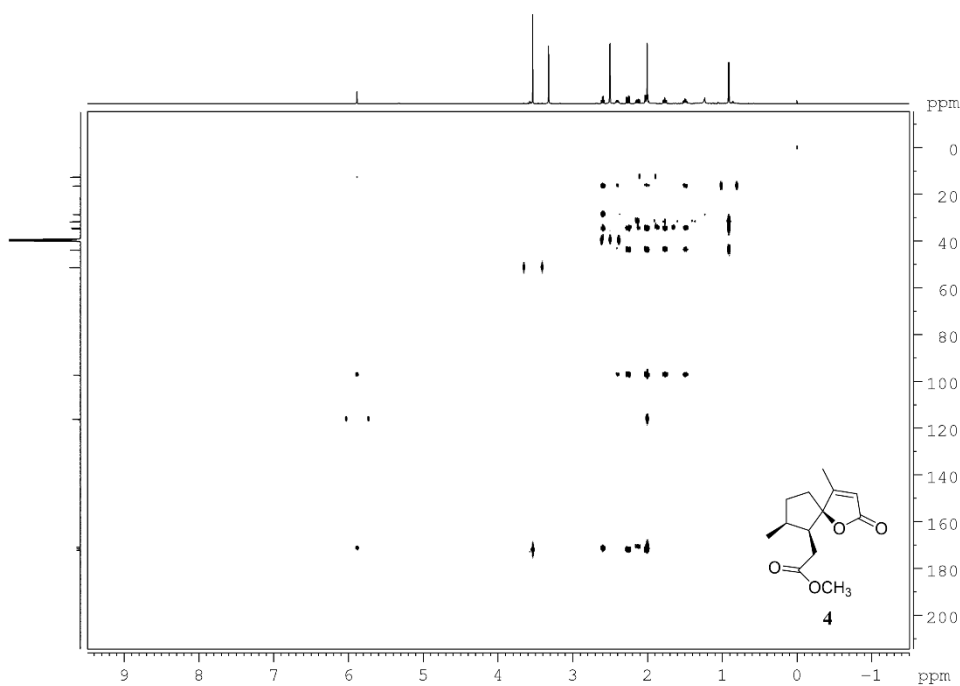

**Fig. S45.** HMBC (600 MHz, DMSO-*d*<sub>6</sub>) spectrum of the new compound **4**

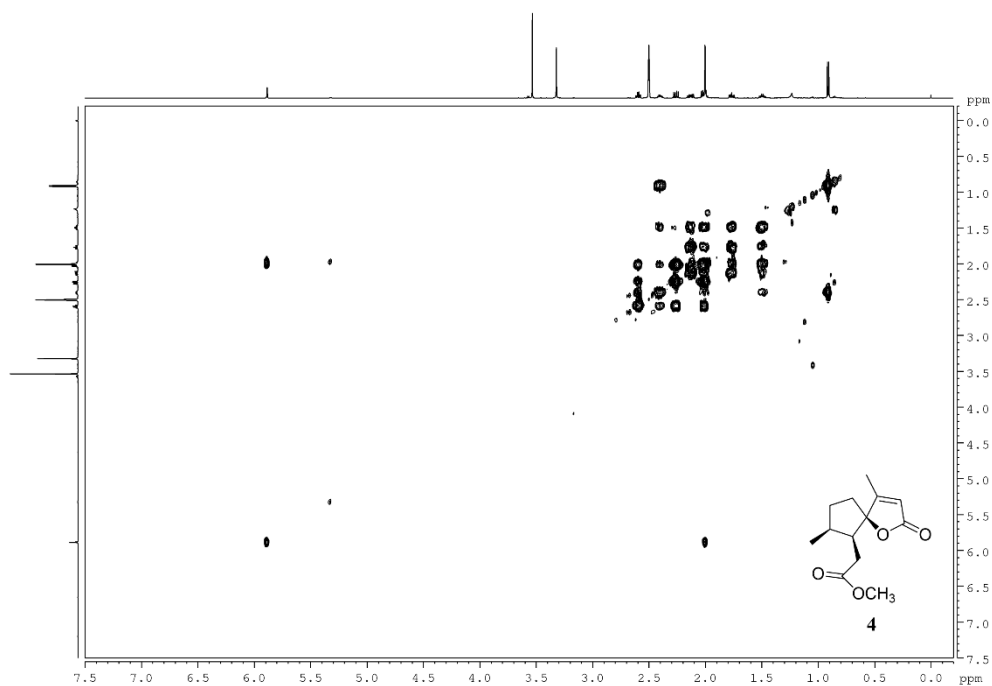

**Fig. S46.** <sup>1</sup>H-<sup>1</sup>H COSY (600 MHz, DMSO-*d*<sub>6</sub>) spectrum of the new compound **4**

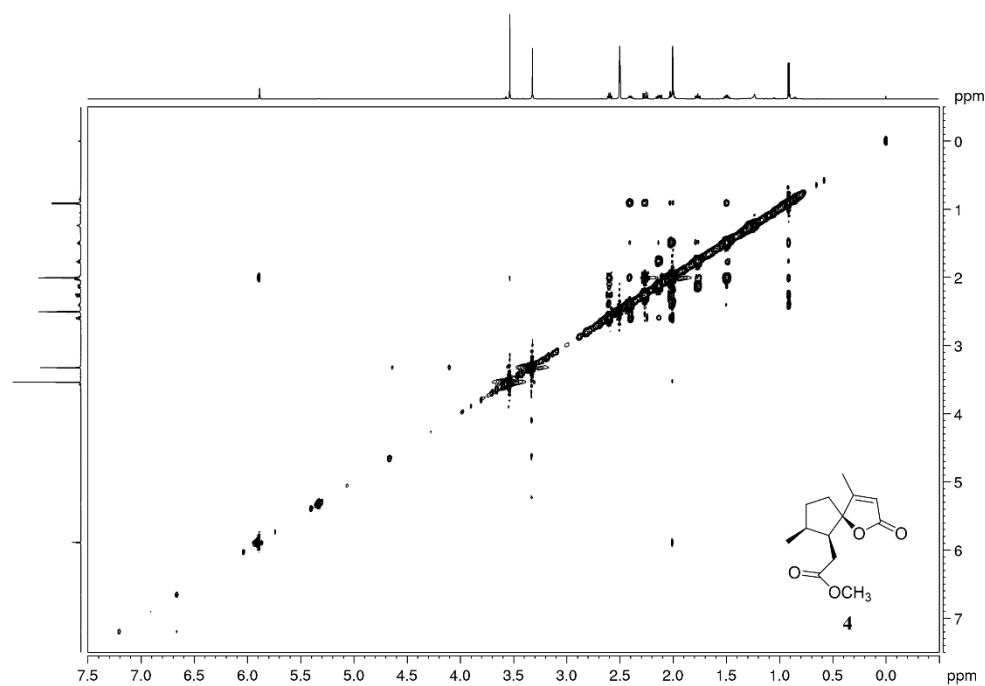

**Fig. S47.** NOESY (600 MHz, DMSO-*d*<sub>6</sub>) spectrum of the new compound **4**

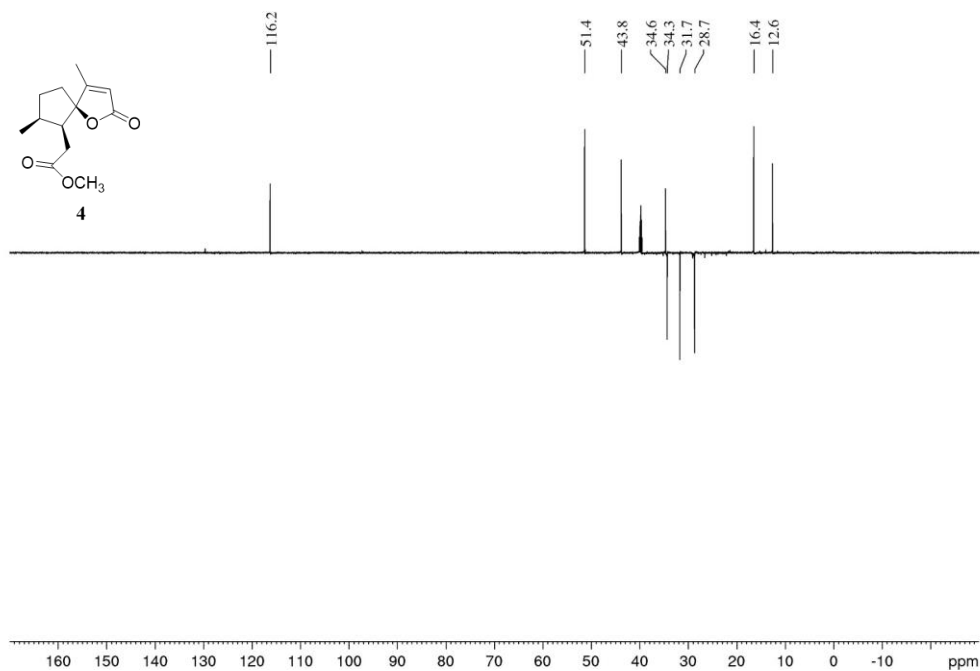

Fig. S48. DEPT (600 MHz, DMSO- $d_6$ ) spectrum of the new compound 4

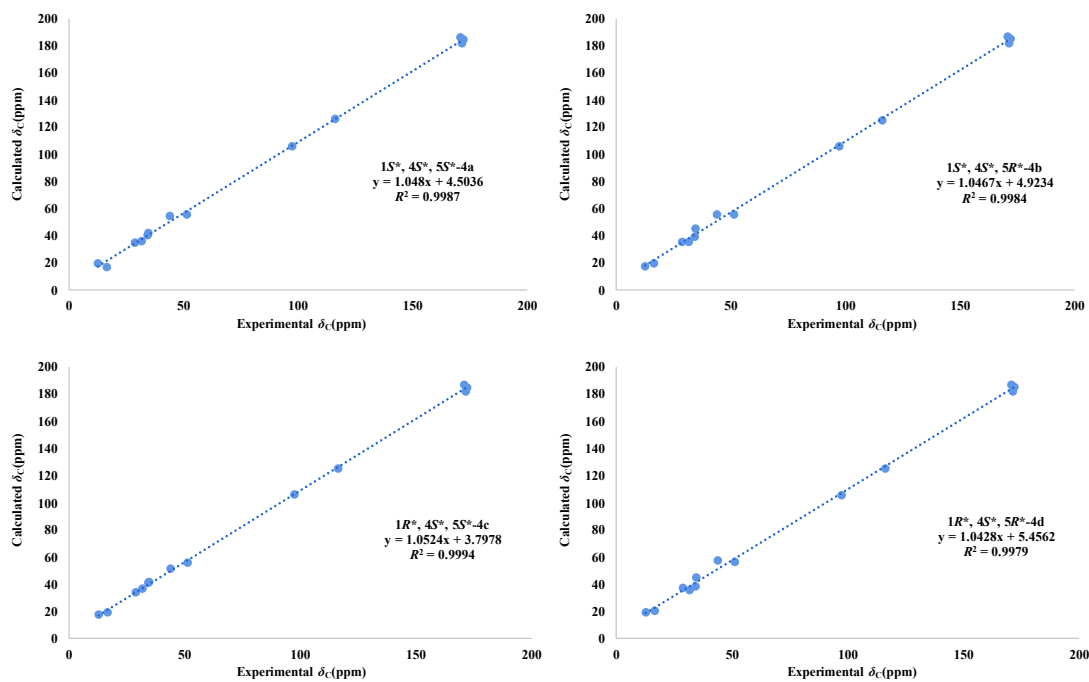

Fig. S49. Linear correlation between the experimental and calculated  $^{13}\text{C}$  NMR chemical shifts of 4a–4d

| Isomer N° |      |          | 1           | 2           | 3          | 4          |
|-----------|------|----------|-------------|-------------|------------|------------|
| DP4+ (%)  |      | H data   | 0.02%       | 0.07%       | 99.83%     | 0.08%      |
|           |      | C data   | 0.00%       | 0.00%       | 100.00%    | 0.00%      |
|           |      | All data | 0.00%       | 0.00%       | 100.00%    | 0.00%      |
| Type      | sp2? | Exp      | 1           | 2           | 3          | 4          |
| c         |      | 97.29    | 106.3575965 | 106.220472  | 105.817365 | 105.481556 |
| c         |      | 34.33    | 40.43704288 | 39.51563315 | 41.1953833 | 38.3435639 |
| c         |      | 31.71    | 36.25722919 | 35.80742761 | 36.8269793 | 35.6659091 |
| c         |      | 34.64    | 42.1949898  | 45.79901629 | 41.5289271 | 44.8766517 |
| c         |      | 43.79    | 54.93436219 | 55.68727525 | 51.5930497 | 57.6607419 |
| c         |      | 28.66    | 34.97046866 | 35.6158676  | 33.7348484 | 37.1783054 |
| c         | X    | 172.19   | 184.56      | 185.13      | 184.84     | 185.1      |
| c         | X    | 171.44   | 181.78      | 181.88      | 181.99     | 182.12     |
| c         | X    | 116.24   | 126.15      | 125.44      | 125.07     | 125.06     |
| c         | X    | 170.79   | 186.21      | 186.74      | 186.72     | 186.93     |
| c         |      | 12.57    | 19.88709052 | 17.58626017 | 17.5175845 | 19.2233849 |
| c         |      | 16.44    | 17.30627447 | 19.82952542 | 19.4199852 | 20.5037284 |
| c         |      | 51.35    | 56.10492778 | 56.03690003 | 56.0022769 | 56.1830863 |
| H         |      | 1.77     | 2.069927848 | 1.963526312 | 2.02239028 | 2.1924044  |
| H         |      | 2.13     | 2.350632009 | 2.423613989 | 2.3394245  | 2.23015201 |
| H         |      | 1.49     | 1.719883478 | 1.60610951  | 1.77515605 | 1.77085257 |
| H         |      | 2        | 2.307682284 | 2.215139082 | 2.29436625 | 2.06105189 |
| H         |      | 2.4      | 2.647742618 | 2.284662678 | 2.60617599 | 2.04943988 |
| H         |      | 2.6      | 3.227438865 | 2.408999929 | 2.90399579 | 2.7466339  |
| H         |      | 2        | 2.357559088 | 2.372815547 | 2.23738809 | 2.1754811  |
| H         |      | 2.26     | 2.543551004 | 2.251540243 | 2.49414585 | 2.35277937 |
| H         | X    | 5.88     | 6           | 5.97        | 5.99       | 5.96       |
| H         |      | 2        | 2.319638019 | 2.321673035 | 2.27382083 | 2.29693511 |
| H         |      | 2        | 2.319638019 | 2.321673035 | 2.27382083 | 2.29693511 |
| H         |      | 2        | 2.319638019 | 2.321673035 | 2.27382083 | 2.29693511 |
| H         |      | 0.91     | 1.022571311 | 1.130169409 | 1.11717157 | 1.09645596 |
| H         |      | 0.91     | 1.022571311 | 1.130169409 | 1.11717157 | 1.09645596 |
| H         |      | 0.91     | 1.022571311 | 1.130169409 | 1.11717157 | 1.09645596 |
| H         |      | 3.53     | 3.785536273 | 3.739276417 | 3.76415494 | 3.77387481 |
| H         |      | 3.53     | 3.785536273 | 3.739276417 | 3.76415494 | 3.77387481 |
| H         |      | 3.53     | 3.785536273 | 3.739276417 | 3.76415494 | 3.77387481 |

Fig. S50. Results of custom DP4+ analysis of **4a–4d**

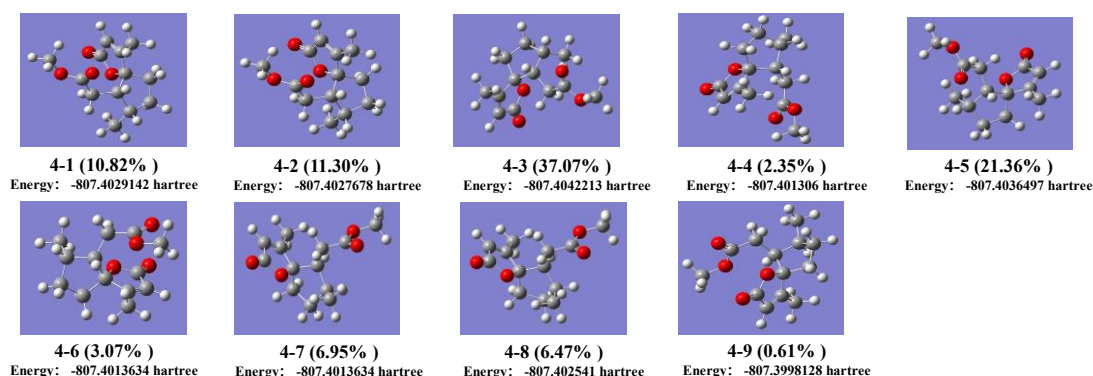

Fig. S51. Most stable conformers of the new compound **4** in solvated model calculations at the B3LYP/6-311++G (2d, p) level in ECD calculation



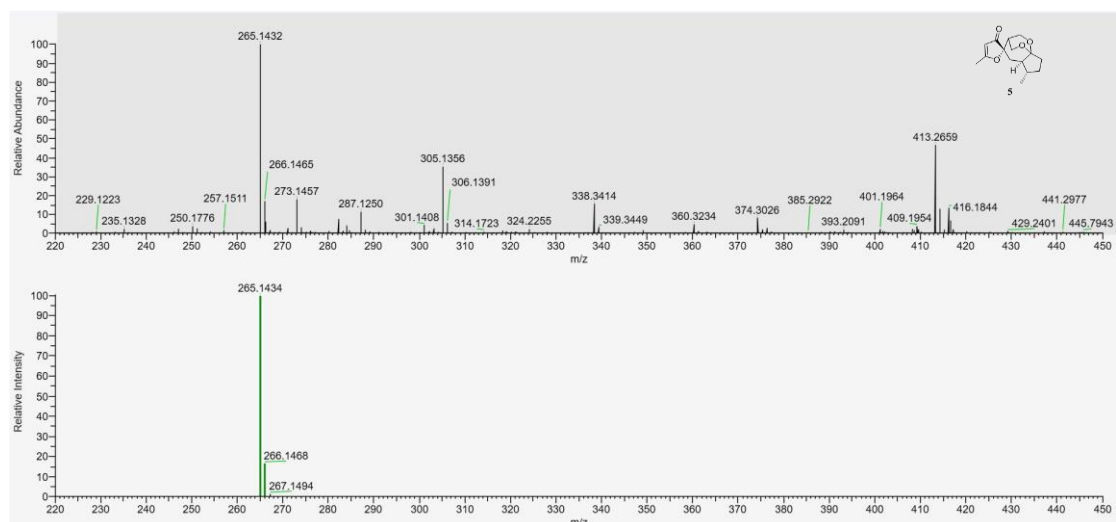

Fig. S52. The HR-ESIMS spectrum of the new compound 5

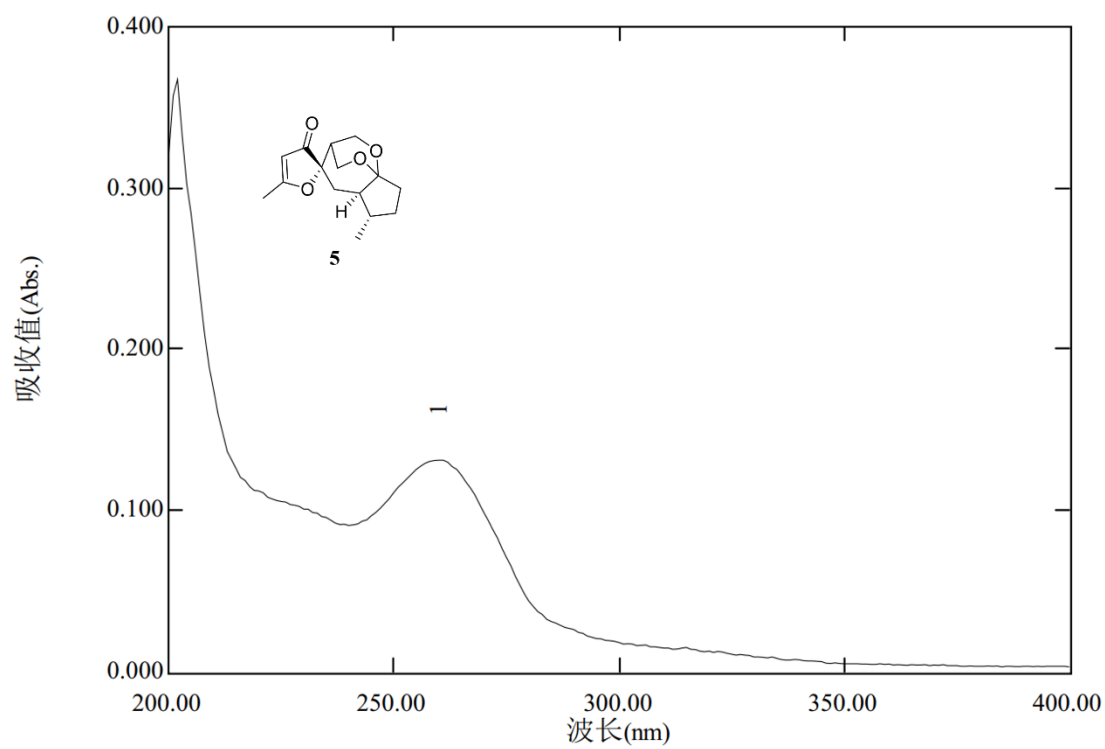

Fig. S53. The UV spectrum of the new compound 5

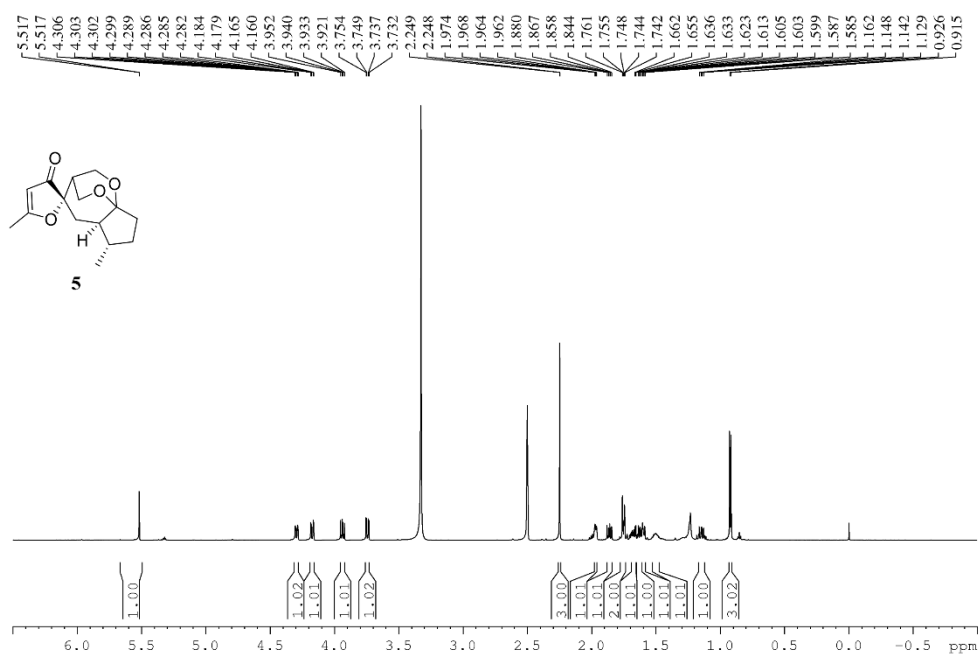

**Fig. S54.**  $^1\text{H}$  NMR (600 MHz,  $\text{DMSO}-d_6$ ) spectrum of the new compound **5**

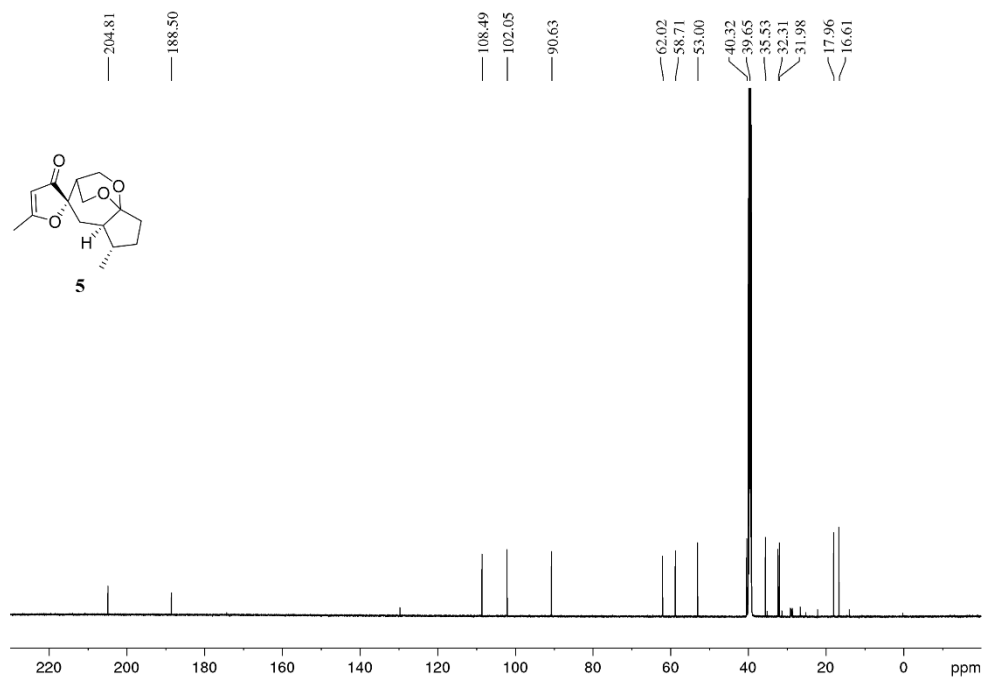

**Fig. S55.**  $^{13}\text{C}$  NMR (150 MHz,  $\text{DMSO}-d_6$ ) spectrum of the new compound **5**

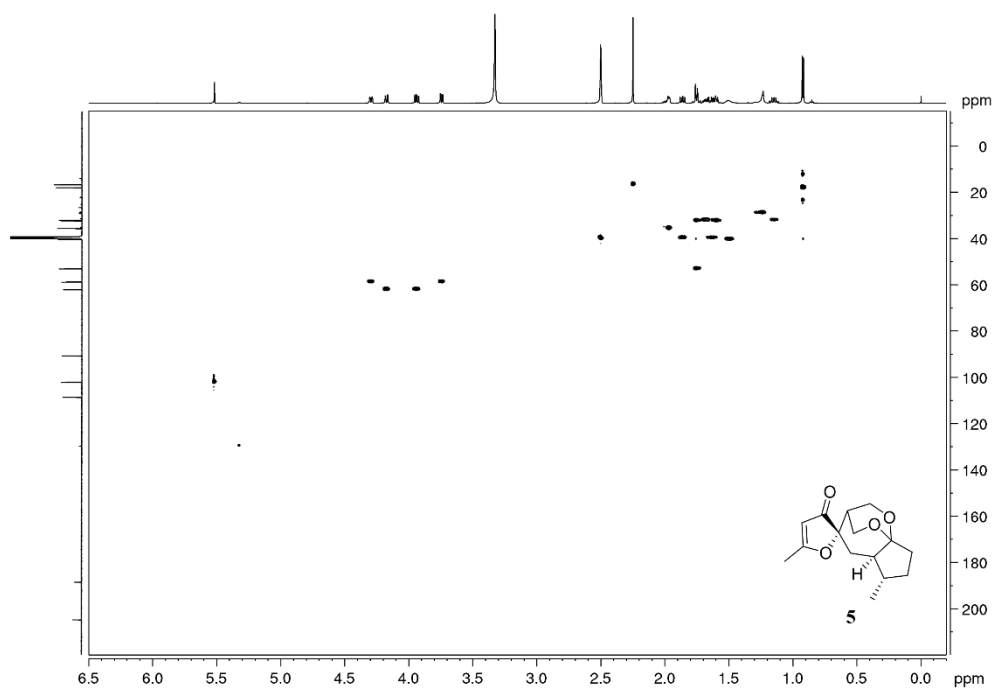

**Fig. S56.** HSQC (600 MHz, DMSO-*d*<sub>6</sub>) spectrum of the new compound **5**

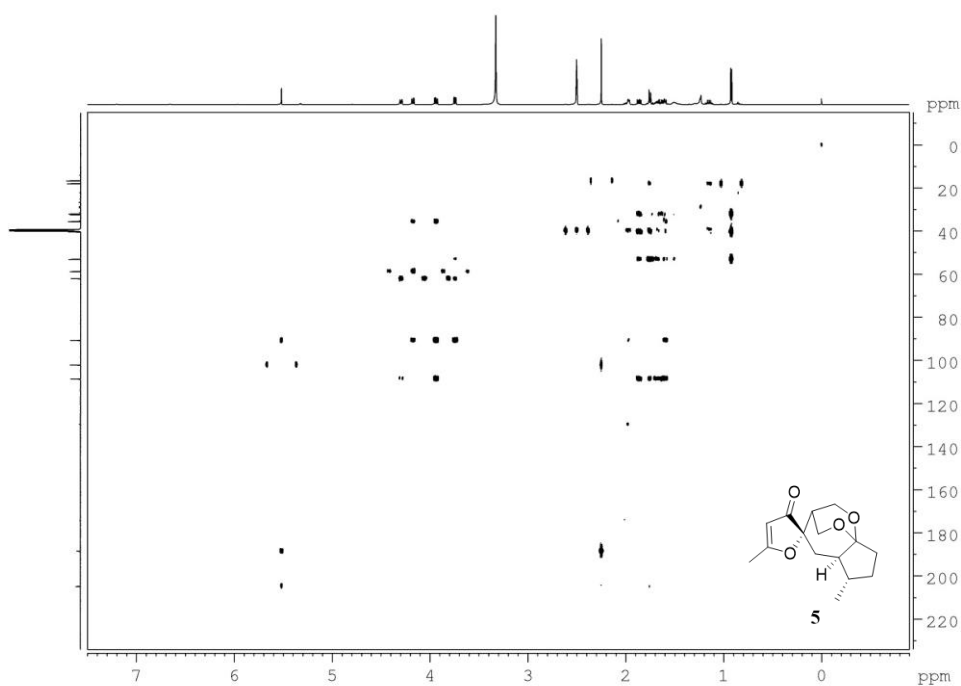

**Fig. S57.** HMBC (600 MHz, DMSO-*d*<sub>6</sub>) spectrum of the new compound **5**

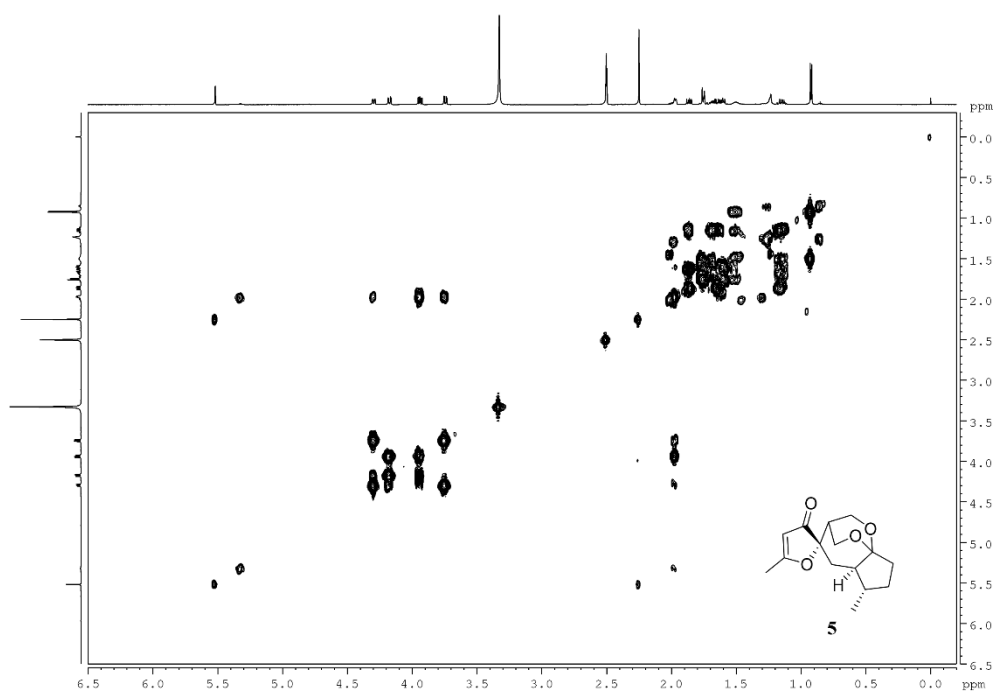

**Fig. S58.**  $^1\text{H}$ - $^1\text{H}$  COSY (600 MHz,  $\text{DMSO-}d_6$ ) spectrum of the new compound **5**

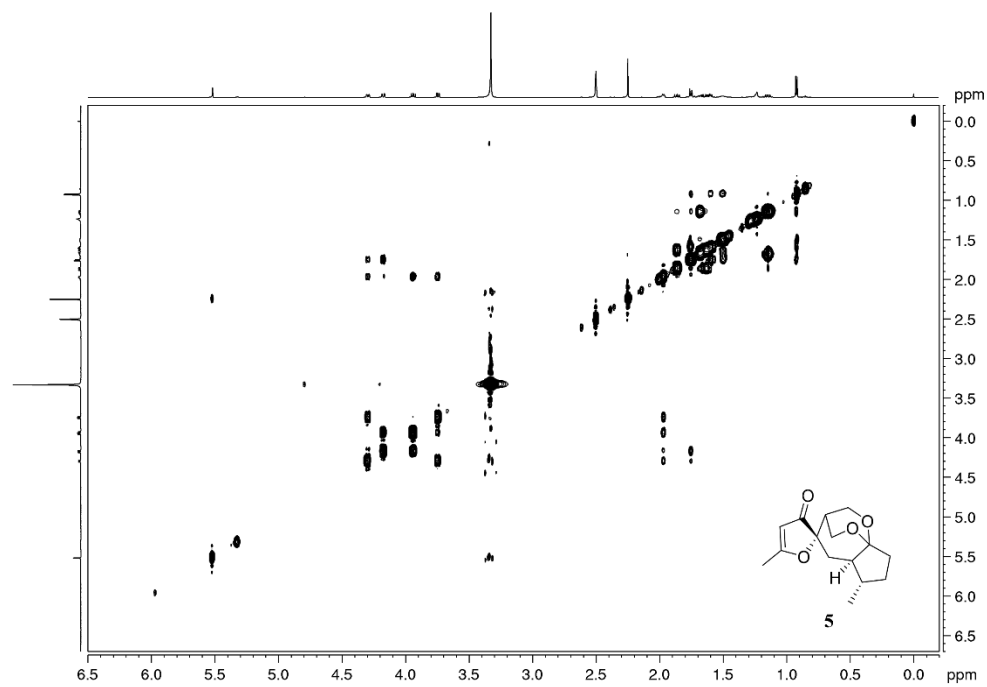

**Fig. S59.** NOESY (600 MHz,  $\text{DMSO-}d_6$ ) spectrum of the new compound **5**

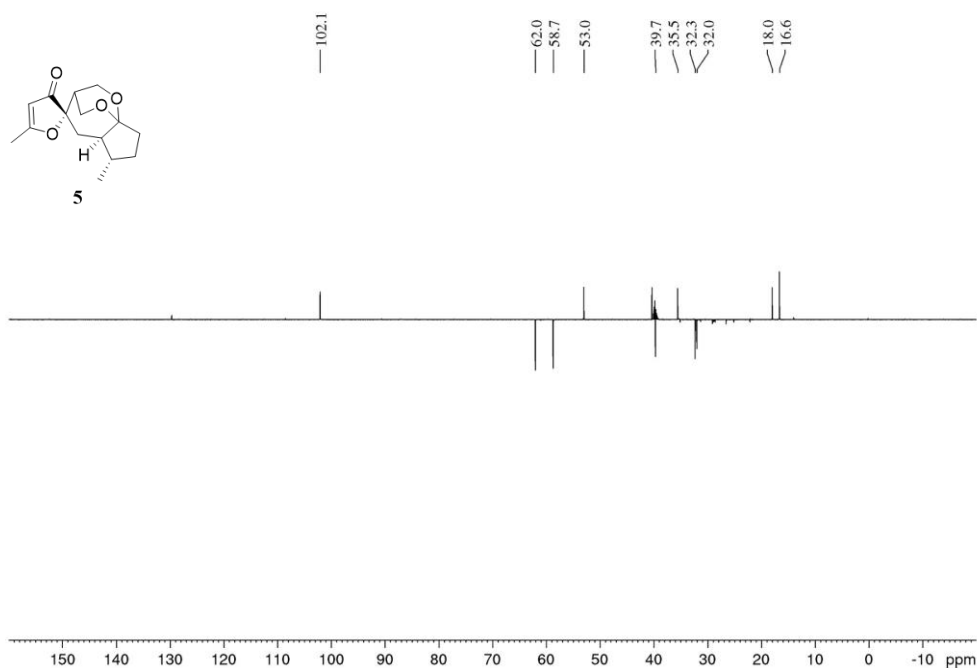

**Fig. S60.** DEPT (600 MHz,  $\text{DMSO-}d_6$ ) spectrum of the new compound **5**

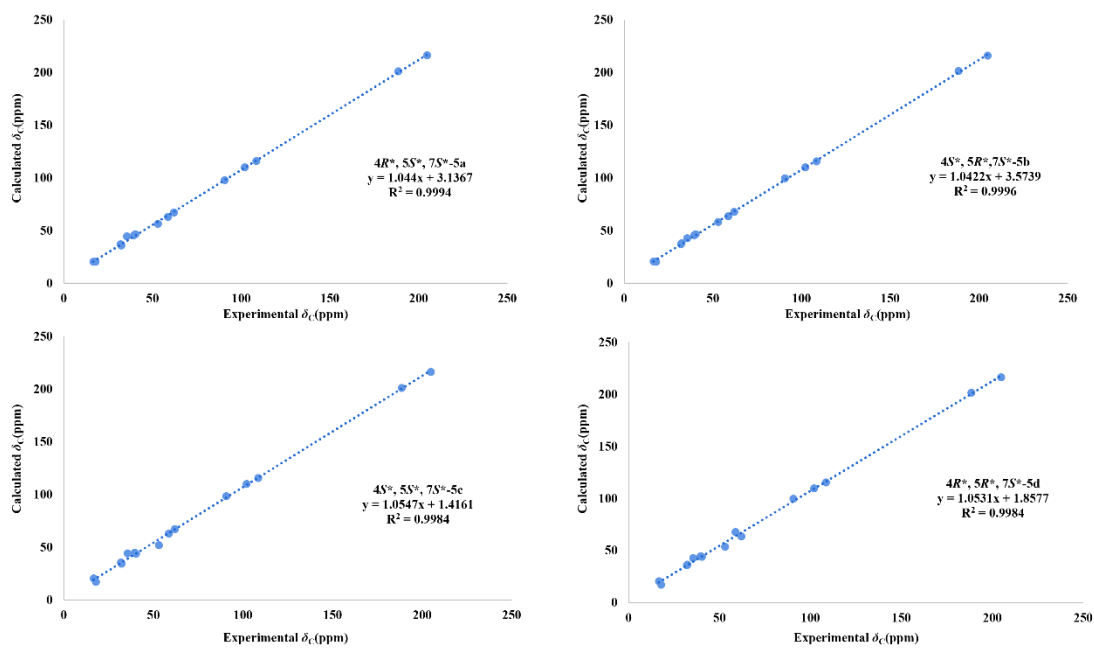

**Fig. S61.** Linear correlation between the experimental and calculated  $^{13}\text{C}$  NMR chemical shifts of **5a–5d**

| Isomer N° |      |          | 1           | 2           | 3          | 4          |
|-----------|------|----------|-------------|-------------|------------|------------|
| DP4+ (%)  |      | H data   | 3.89%       | 96.11%      | 0.00%      | 0.00%      |
|           |      | C data   | 35.12%      | 64.87%      | 0.00%      | 0.00%      |
|           |      | All data | 2.15%       | 97.85%      | 0.00%      | 0.00%      |
| Type      | sp2? | Exp      | 1           | 2           | 3          | 4          |
| c         | x    | 204.84   | 216.2931327 | 215.872904  | 216.265667 | 216.214353 |
| c         | x    | 102.06   | 109.9925488 | 109.7932006 | 110.048507 | 109.606477 |
| c         | x    | 188.53   | 201.1197567 | 201.4197772 | 201.119649 | 201.513006 |
| c         |      | 90.64    | 97.81763383 | 99.6471005  | 98.4318321 | 99.5804781 |
| c         |      | 35.53    | 44.28533678 | 42.78876245 | 44.2042635 | 42.6762297 |
| c         |      | 62.02    | 67.05470241 | 67.65267298 | 67.1822727 | 63.6128303 |
| c         |      | 108.51   | 116.0325968 | 115.7113915 | 115.642197 | 115.445233 |
| c         |      | 53.01    | 56.45842104 | 58.1161949  | 51.8226678 | 53.5597654 |
| c         |      | 32.32    | 35.67253123 | 37.89366755 | 34.1895571 | 36.424083  |
| c         |      | 58.72    | 62.77497821 | 63.40517849 | 62.8176218 | 67.714366  |
| c         |      | 39.66    | 45.59537637 | 45.50288227 | 44.6836861 | 44.5129432 |
| c         |      | 31.98    | 36.94492278 | 37.04421621 | 35.6123536 | 35.8091618 |
| c         |      | 40.33    | 46.59837939 | 46.42499234 | 43.7531386 | 43.8212939 |
| c         |      | 17.96    | 20.36732188 | 20.32339979 | 16.9879195 | 17.1354666 |
| c         |      | 16.61    | 20.39749046 | 20.47463742 | 20.3925378 | 20.4691274 |
| H         | x    | 5.52     | 5.6163133   | 5.65843514  | 5.62293027 | 5.64700386 |
| H         |      | 1.97     | 1.773456126 | 1.84141608  | 1.77999993 | 1.8421244  |
| H         |      | 4.17     | 4.435940154 | 4.588368918 | 4.46922898 | 4.609847   |
| H         |      | 3.94     | 4.23454298  | 4.145804061 | 4.24507653 | 4.16362998 |
| H         |      | 1.75     | 2.146410892 | 2.071786448 | 2.77520816 | 2.71987499 |
| H         |      | 1.75     | 2.057084975 | 1.948941856 | 2.21677973 | 2.15266602 |
| H         |      | 1.75     | 1.892556761 | 1.755990385 | 1.69816946 | 1.57738911 |
| H         |      | 4.3      | 5.035224128 | 4.713089764 | 5.05593898 | 4.7265111  |
| H         |      | 3.74     | 3.857857682 | 4.040342188 | 3.88332707 | 4.04708684 |
| H         |      | 1.86     | 2.067171516 | 2.078234646 | 2.02444694 | 2.02157682 |
| H         |      | 1.63     | 1.885033268 | 1.882880771 | 1.98083612 | 1.98819186 |
| H         |      | 1.68     | 1.825452744 | 1.860155159 | 1.93541109 | 1.95998054 |
| H         |      | 1.15     | 1.443434162 | 1.454677787 | 1.53660517 | 1.57130944 |
| H         |      | 1.5      | 1.733326605 | 1.799685288 | 2.30984469 | 2.34777486 |
| H         |      | 0.92     | 1.077291128 | 1.096560865 | 0.98050853 | 1.00050489 |
| H         |      | 0.92     | 1.077291128 | 1.096560865 | 0.98050853 | 1.00050489 |
| H         |      | 0.92     | 1.077291128 | 1.096560865 | 0.98050853 | 1.00050489 |
| H         |      | 2.53     | 2.420576602 | 2.443853198 | 2.41860794 | 2.43630689 |
| H         |      | 2.53     | 2.420576602 | 2.443853198 | 2.41860794 | 2.43630689 |
| H         |      | 2.53     | 2.420576602 | 2.443853198 | 2.41860794 | 2.43630689 |

**Fig. S62.** Results of custom DP4+ analysis of **5a–5d**

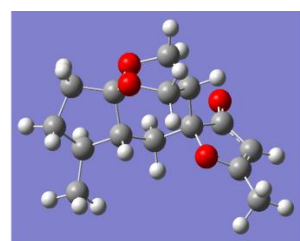

**5-1 (96.78% )**

Energy: -884.7955324 hartree

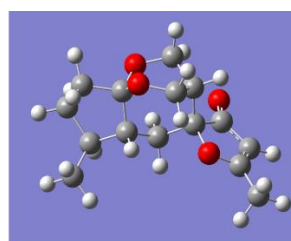

**5-2 (3.22% )**

Energy: -884.7923194 hartree

**Fig. S63.** Most stable conformers of the new compound **5** in solvated model calculations at the B3LYP/6-311++G (2d, p) level in ECD calculation

+MS, 0.2min #26

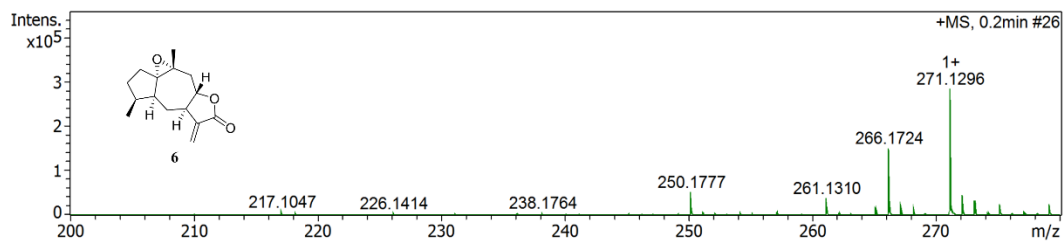

C<sub>15</sub>H<sub>20</sub>O<sub>3</sub>, M+nNa, 271.1305

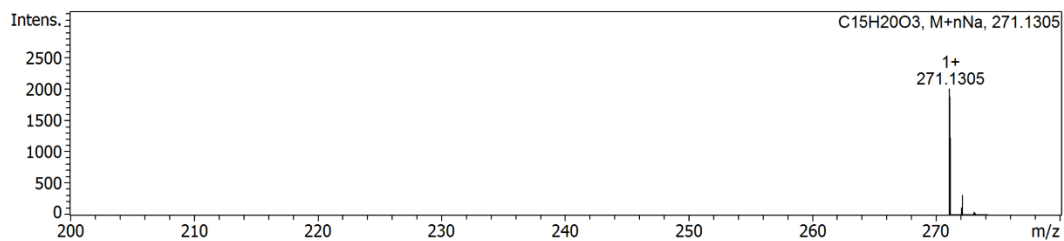

Fig. S64. The HR-ESIMS spectrum of the new compound 6

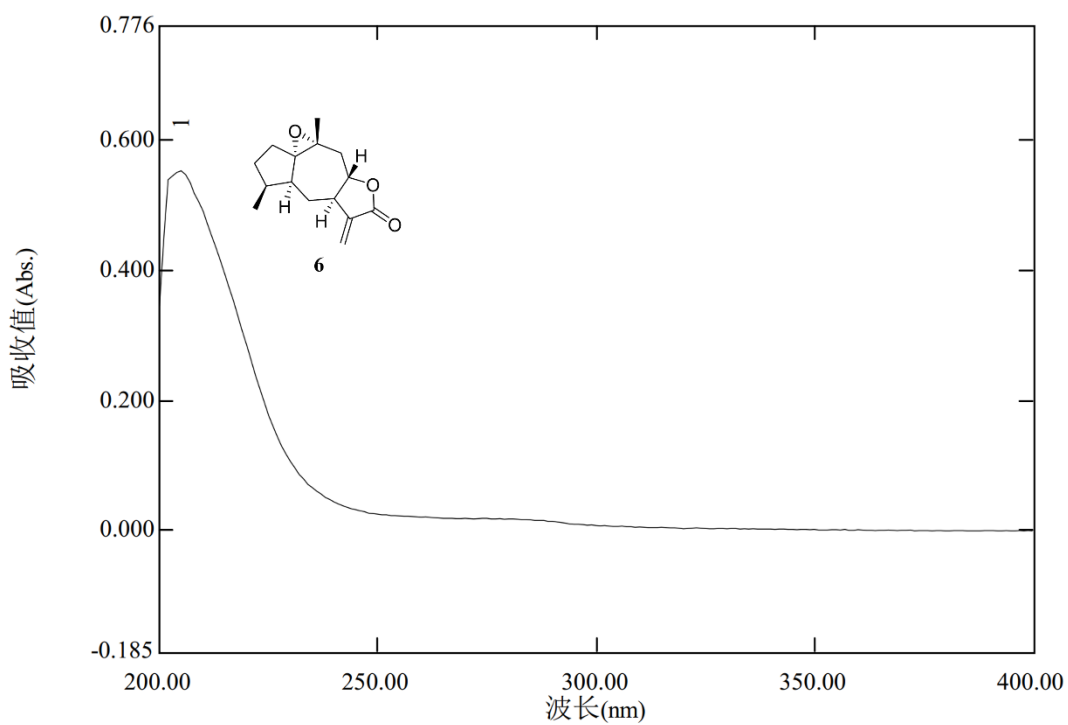

Fig. S65. The UV spectrum of the new compound 6

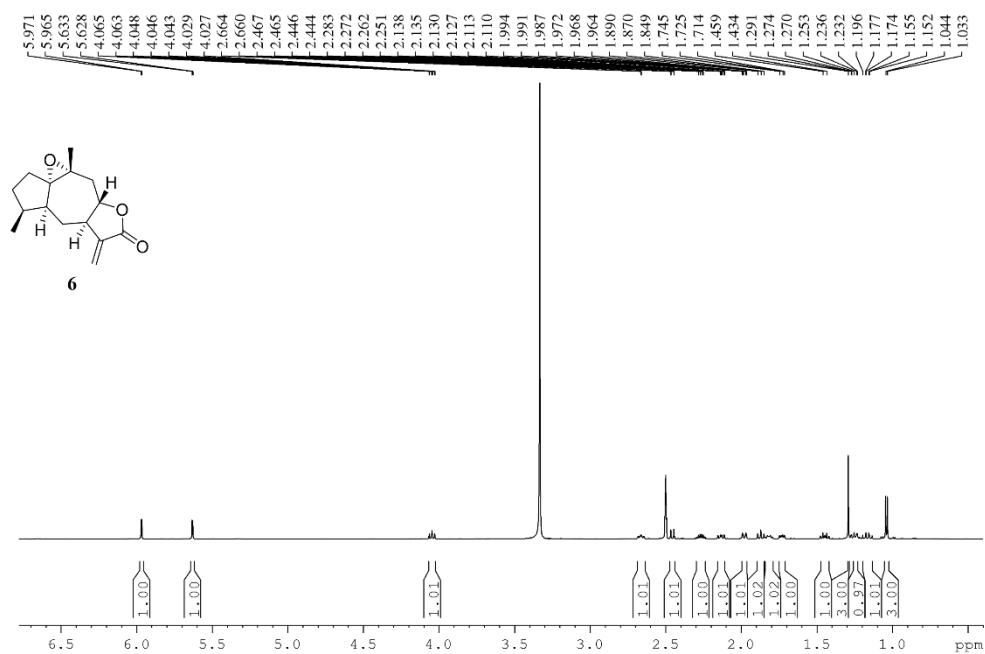

Fig. S66. <sup>1</sup>H NMR (600 MHz, DMSO-*d*<sub>6</sub>) spectrum of the new compound 6

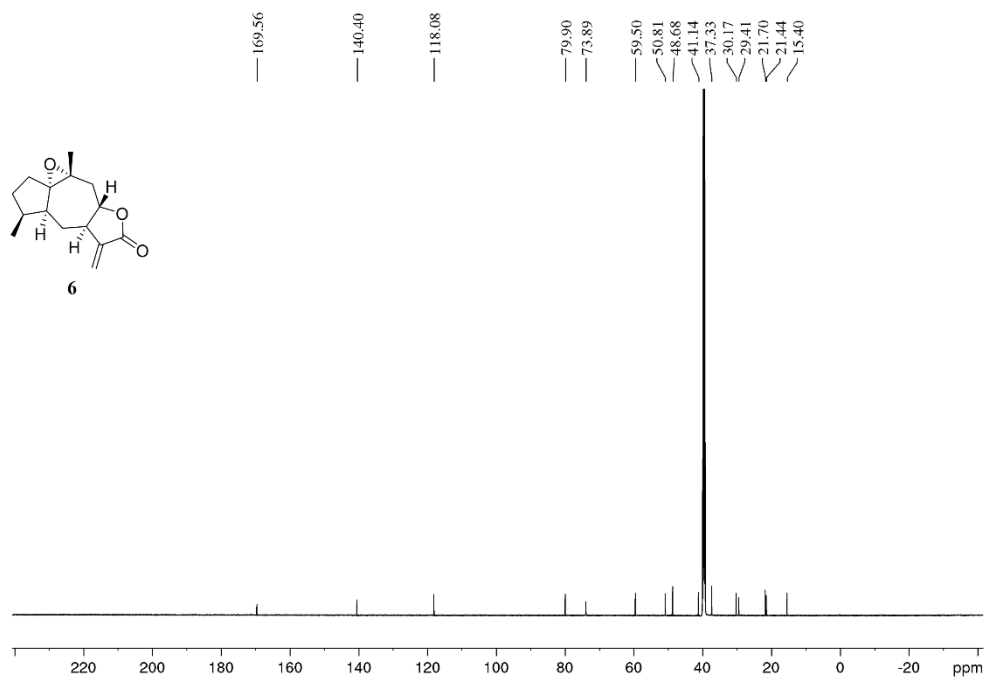

Fig. S67. <sup>13</sup>C NMR (600 MHz, DMSO-*d*<sub>6</sub>) spectrum of the new compound 6



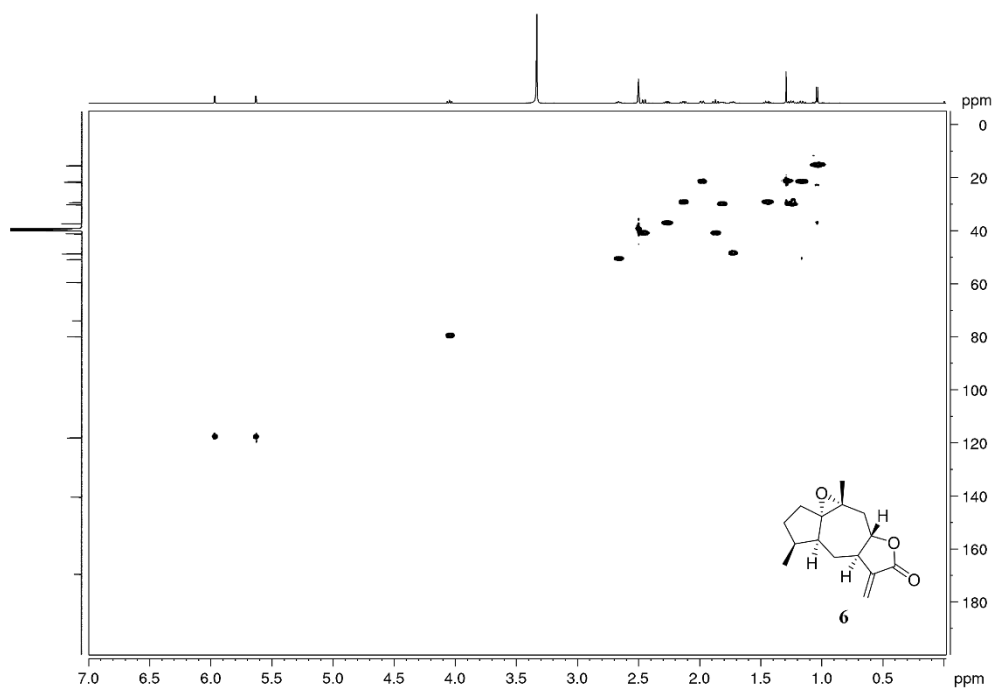

**Fig. S68.** HSQC (600 MHz, DMSO-*d*<sub>6</sub>) spectrum of the new compound **6**

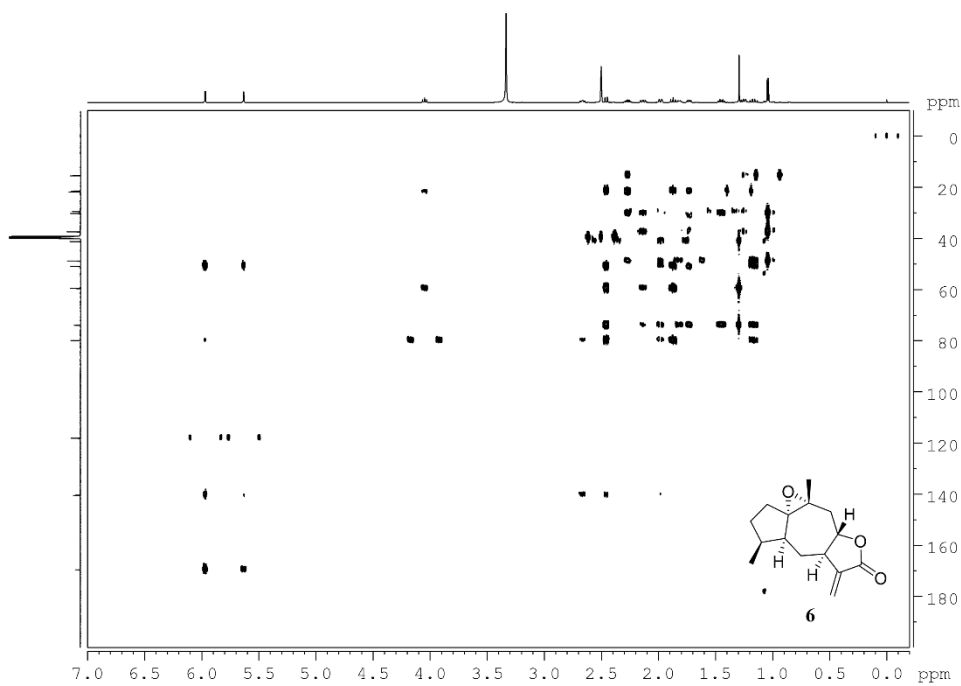

**Fig. S69.** HMBC (600 MHz, DMSO-*d*<sub>6</sub>) spectrum of the new compound **6**

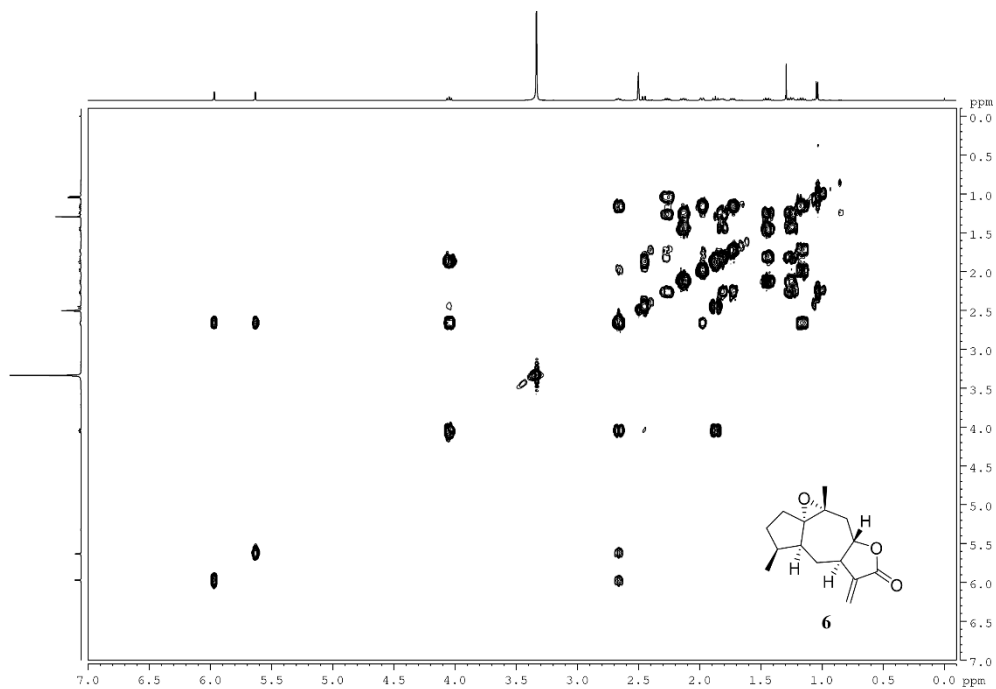

**Fig. S70.** <sup>1</sup>H-<sup>1</sup>H COSY (600 MHz, DMSO-*d*<sub>6</sub>) spectrum of the new compound **6**

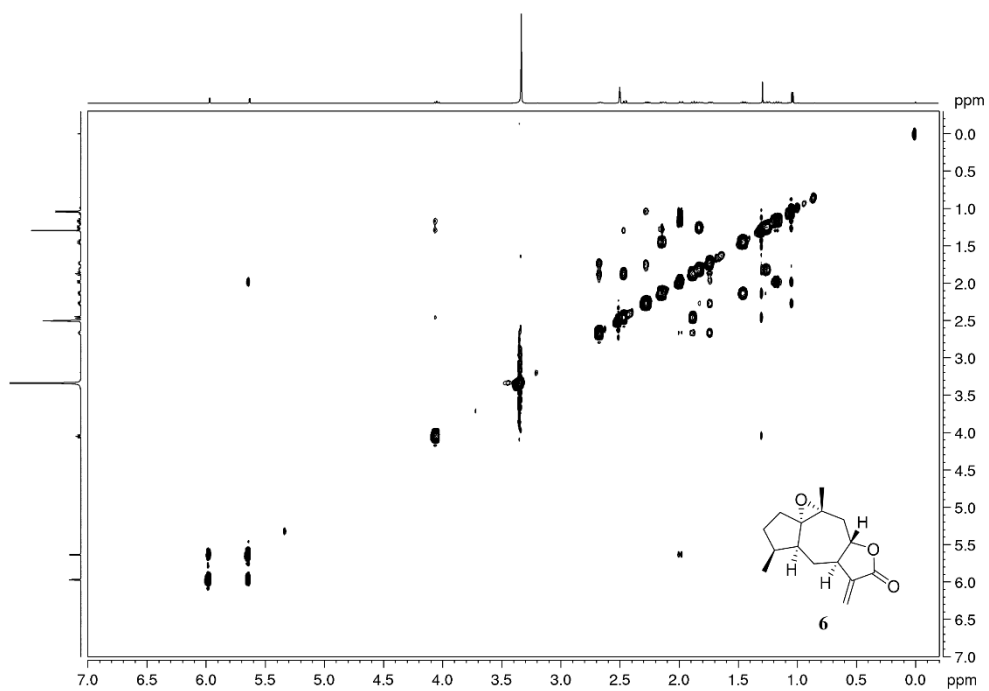

**Fig. S71.** NOESY (600 MHz, DMSO-*d*<sub>6</sub>) spectrum of the new compound **6**

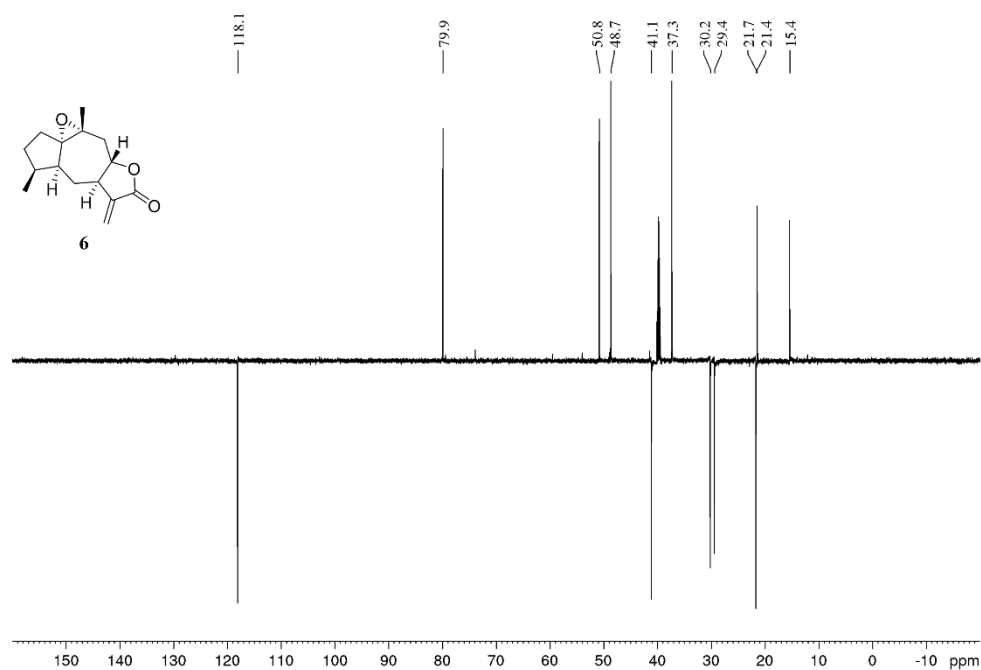

**Fig. S72.** DEPT (600 MHz, DMSO-*d*<sub>6</sub>) spectrum of the new compound **6**

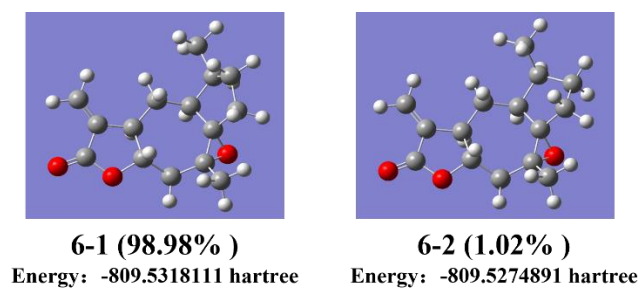

**Fig. S73.** Most stable conformers of the new compound **6** in solvated model calculations at the B3LYP/6-311++G (2d, p) level in ECD calculation

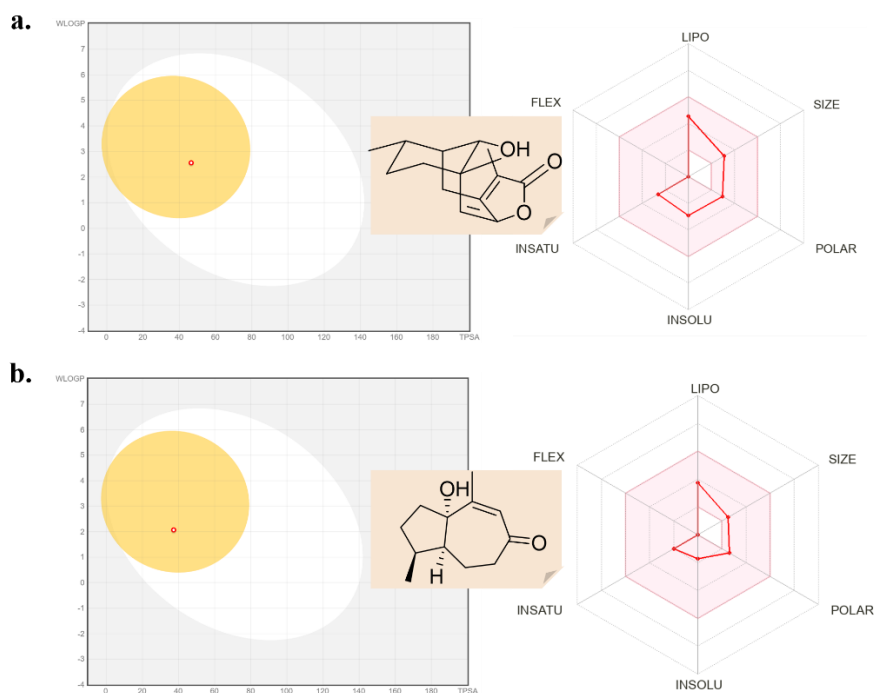

**Fig. S74.** The BOILED-Egg plot and the Bioavailability Radar plot of **2 (a)** and **3 (b)**. The BOILED-Egg allows for intuitive evaluation of passive gastrointestinal absorption and brain penetration in function of the position of the molecules in the WLOGP-versus-TPSA referential. The white region is for high probability of passive absorption by the gastrointestinal tract, and the yellow region (yolk) is for high probability of brain penetration. Yolk and white areas are not mutually exclusive. In addition the points are colored in blue if predicted as actively effluxed by P-gp (PGP+) and in red if predicted as non-substrate of P-gp (PGP-). The Bioavailability Radar enables a first glance at the drug-likeness of a molecule and the pink area represents the optimal range for each properties.
